# Supplementary material
Source: PubMed Central journal article supplement (PMC10152387)
Supplement: mmc1.pdf [file mmc1.pdf]

# THE LANCET

## Supplementary appendix

This appendix formed part of the original submission and has been peer reviewed. We post it as supplied by the authors.

Supplement to: Bollyky TJ, Castro E, Aravkin AY, et al. Assessing COVID-19 pandemic policies and behaviours and their economic and educational trade-offs across US states from January, 2020, to July, 2022: an observational analysis. *Lancet* 2023; published online March 23. [https://doi.org/10.1016/S0140-6736\(23\)00461-0](https://doi.org/10.1016/S0140-6736(23)00461-0).

## Appendix 1: Supplemental methods and results to “Assessing COVID-19 policies and behaviours and their economic and educational trade-offs across US states from January 1, 2020, to July 31, 2022: an observational analysis”

This appendix provides further methodological and supplementary results for “Assessing COVID-19 policies and behaviours and their economic and educational trade-offs across US states from January 1, 2020, to July 31, 2022: an observational analysis”.

## Table of Contents

|                                                                                                                                                                                                                                                   |           |
|---------------------------------------------------------------------------------------------------------------------------------------------------------------------------------------------------------------------------------------------------|-----------|
| <b><i>Appendix 1: Supplemental methods and results to “Assessing COVID-19 policies and behaviours and their economic and educational trade-offs across US states from January 1, 2020, to July 31, 2022: an observational analysis”</i></b> ..... | <b>1</b>  |
| <b>Section 1: List of abbreviations</b> .....                                                                                                                                                                                                     | <b>2</b>  |
| <b>Section 2: GATHER criteria</b> .....                                                                                                                                                                                                           | <b>4</b>  |
| 2.1 GATHER checklist .....                                                                                                                                                                                                                        | 4         |
| <b>Section 3: Data inputs</b> .....                                                                                                                                                                                                               | <b>6</b>  |
| 3.1 Death model inputs.....                                                                                                                                                                                                                       | 6         |
| 3.2 Infection model inputs .....                                                                                                                                                                                                                  | 13        |
| 3.3 GDP model inputs .....                                                                                                                                                                                                                        | 17        |
| 3.4 Employment model inputs.....                                                                                                                                                                                                                  | 26        |
| 3.5 Education model inputs .....                                                                                                                                                                                                                  | 35        |
| 3.6 Dependent variables by state .....                                                                                                                                                                                                            | 40        |
| 3.7 Correlation among independent variables .....                                                                                                                                                                                                 | 43        |
| 3.8 Reduction in economic indicators and education scores by state.....                                                                                                                                                                           | 44        |
| 3.9 Syndemic framework for COVID-19 .....                                                                                                                                                                                                         | 45        |
| 3.10 Mandate propensity .....                                                                                                                                                                                                                     | 47        |
| <b>Section 4: Methods</b> .....                                                                                                                                                                                                                   | <b>48</b> |
| 4.1 Modeling COVID-19 Deaths .....                                                                                                                                                                                                                | 48        |
| 4.2 Modeling COVID-19 Infections.....                                                                                                                                                                                                             | 50        |
| 4.3 Modeling GDP .....                                                                                                                                                                                                                            | 51        |
| 4.4 Modeling Employment.....                                                                                                                                                                                                                      | 52        |
| 4.5 Modeling Education .....                                                                                                                                                                                                                      | 53        |
| <b>Section 5: Sensitivity Analyses</b> .....                                                                                                                                                                                                      | <b>54</b> |
| 5.1 Infection and death results using the logged cumulative rate as the dependent variable for all models....                                                                                                                                     | 54        |
| 5.2 Infection and death results using negative binomial model.....                                                                                                                                                                                | 56        |
| 5.3 Infection and death results including poverty as a control for COVID-19 policies and behaviors.....                                                                                                                                           | 57        |
| 5.4 Infection and death results including the first principal component of a PCA of all statistically significant pre-COVID-19 factors as control variables for COVID-19 policies and behaviours.....                                             | 59        |
| 5.5 Death results without control variables.....                                                                                                                                                                                                  | 61        |
| 5.6 Death results with no control variables and no age standardization of cumulative death rate.....                                                                                                                                              | 62        |
| 5.7 Death results without control variables, dependent variable specified as cumulative reported deaths per capita .....                                                                                                                          | 63        |
| 5.8 Reporting E-Values for unmeasured confounding.....                                                                                                                                                                                            | 64        |
| <b>Section 6: Supplementary Results</b> .....                                                                                                                                                                                                     | <b>67</b> |
| 6.1 Factors associated with age-adjusted cumulative death rates and cumulative infection rates.....                                                                                                                                               | 67        |
| 6.2 Factors associated with reduction in standardised GDP, employment rate, and mathematics and reading test scores.....                                                                                                                          | 72        |

### Section 1: List of abbreviations

| <b>Abbreviation</b> | <b>Full phrase</b> |
|---------------------|--------------------|
|---------------------|--------------------|

|                   |                                                                    |
|-------------------|--------------------------------------------------------------------|
| <b>ACA</b>        | Affordable Care Act                                                |
| <b>BMI</b>        | Body mass index                                                    |
| <b>CDC</b>        | United States Centers for Disease Control and Prevention           |
| <b>COPD</b>       | Chronic obstructive pulmonary disease                              |
| <b>COVID-19</b>   | Coronavirus disease 2019                                           |
| <b>IHME</b>       | Institute for Health Metrics and Evaluation                        |
| <b>GATHER</b>     | Guidelines for Accurate and Transparent Health Estimates Reporting |
| <b>GDP</b>        | Gross domestic product                                             |
| <b>NAEP</b>       | National Assessment of Educational Progress                        |
| <b>NCHS</b>       | National Center for Health Statistics                              |
| <b>NPI</b>        | Non-pharmaceutical intervention                                    |
| <b>PCA</b>        | Principle component analysis                                       |
| <b>SARS-Cov-2</b> | Severe acute respiratory syndrome coronavirus 2                    |
| <b>WHO</b>        | World Health Organization                                          |

## Section 2: GATHER criteria

This study complies with GATHER recommendations. We have documented the steps in our analytical procedures and detailed the data sources used. See Table S1 for the GATHER checklist. The GATHER recommendations can be found on the [GATHER website](#).

### 2.1 GATHER checklist

*Checklist for compliance with the Guidance for Accurate and Transparent Health Estimates Reporting (GATHER)*

| Item #                                                                                                | Checklist item                                                                                                                                                                                                                                                                                                                                                                            | Reported on page #                                                                                                                                                              |
|-------------------------------------------------------------------------------------------------------|-------------------------------------------------------------------------------------------------------------------------------------------------------------------------------------------------------------------------------------------------------------------------------------------------------------------------------------------------------------------------------------------|---------------------------------------------------------------------------------------------------------------------------------------------------------------------------------|
| <b>Objectives and funding</b>                                                                         |                                                                                                                                                                                                                                                                                                                                                                                           |                                                                                                                                                                                 |
| 1                                                                                                     | Define the indicator(s), populations (including age, sex, and geographic entities), and time period(s) for which estimates were made.                                                                                                                                                                                                                                                     | Summary. Main Text: Introduction, Methods                                                                                                                                       |
| 2                                                                                                     | List the funding sources for the work.                                                                                                                                                                                                                                                                                                                                                    | Summary. Main Text: Acknowledgements and declarations.                                                                                                                          |
| <b>Data Inputs</b>                                                                                    |                                                                                                                                                                                                                                                                                                                                                                                           |                                                                                                                                                                                 |
| <i>For all data inputs from multiple sources that are synthesized as part of the study:</i>           |                                                                                                                                                                                                                                                                                                                                                                                           |                                                                                                                                                                                 |
| 3                                                                                                     | Describe how the data were identified and how the data were accessed.                                                                                                                                                                                                                                                                                                                     | Main Text: Methods. Supplementary Appendix: Section 3.                                                                                                                          |
| 4                                                                                                     | Specify the inclusion and exclusion criteria. Identify all ad-hoc exclusions.                                                                                                                                                                                                                                                                                                             | Main Text: Methods. Supplementary Appendix: section 3.                                                                                                                          |
| 5                                                                                                     | Provide information on all included data sources and their main characteristics. For each data source used, report reference information or contact name/institution, population represented, data collection method, year(s) of data collection, sex and age range, diagnostic criteria or measurement method, and sample size, as relevant.                                             | Supplementary Appendix: Section 3. Main characteristics of data, metadata, and/or NIDs available through: <a href="http://ghdx.healthdata.org/">http://ghdx.healthdata.org/</a> |
| 6                                                                                                     | Identify and describe any categories of input data that have potentially important biases (e.g., based on characteristics listed in item 5).                                                                                                                                                                                                                                              | Main text: Limitations section. Supplementary appendix: Section 4.                                                                                                              |
| <i>For data inputs that contribute to the analysis but were not synthesized as part of the study:</i> |                                                                                                                                                                                                                                                                                                                                                                                           |                                                                                                                                                                                 |
| 7                                                                                                     | Describe and give sources for any other data inputs.                                                                                                                                                                                                                                                                                                                                      | Supplementary Appendix: Section 3.                                                                                                                                              |
| <i>For all data inputs:</i>                                                                           |                                                                                                                                                                                                                                                                                                                                                                                           |                                                                                                                                                                                 |
| 8                                                                                                     | Provide all data inputs in a file format from which data can be efficiently extracted (e.g., a spreadsheet rather than a PDF), including all relevant meta-data listed in item 5. For any data inputs that cannot be shared because of ethical or legal reasons, such as third-party ownership, provide a contact name or the name of the institution that retains the right to the data. | Available through: <a href="http://ghdx.healthdata.org/">http://ghdx.healthdata.org/</a>                                                                                        |
| <b>Data analysis</b>                                                                                  |                                                                                                                                                                                                                                                                                                                                                                                           |                                                                                                                                                                                 |
| 9                                                                                                     | Provide a conceptual overview of the data analysis method. A diagram may be helpful.                                                                                                                                                                                                                                                                                                      | Main text: Methods.                                                                                                                                                             |

|                               |                                                                                                                                                                                                                                                                         |                                                                                             |
|-------------------------------|-------------------------------------------------------------------------------------------------------------------------------------------------------------------------------------------------------------------------------------------------------------------------|---------------------------------------------------------------------------------------------|
| 10                            | Provide a detailed description of all steps of the analysis, including mathematical formulae. This description should cover, as relevant, data cleaning, data pre-processing, data adjustments and weighting of data sources, and mathematical or statistical model(s). | Main text: Methods.<br>Supplementary Appendix: Section 4                                    |
| 11                            | Describe how candidate models were evaluated and how the final model(s) were selected.                                                                                                                                                                                  | Supplementary Appendix: Sections 4 & 5                                                      |
| 12                            | Provide the results of an evaluation of model performance, if done, as well as the results of any relevant sensitivity analysis.                                                                                                                                        | Supplementary Appendix: Sections 4 and 5                                                    |
| 13                            | Describe methods for calculating uncertainty of the estimates. State which sources of uncertainty were, and were not, accounted for in the uncertainty analysis.                                                                                                        | Main Text: Methods.<br>Supplementary Appendix: Section 4.                                   |
| 14                            | State how analytic or statistical source code used to generate estimates can be accessed.                                                                                                                                                                               | Available through:<br><a href="https://github.com/ihmeuw">https://github.com/ihmeuw</a>     |
| <b>Results and Discussion</b> |                                                                                                                                                                                                                                                                         |                                                                                             |
| 15                            | Provide published estimates in a file format from which data can be efficiently extracted.                                                                                                                                                                              | Available through:<br><a href="http://ghdx.healthdata.org/">http://ghdx.healthdata.org/</a> |
| 16                            | Report a quantitative measure of the uncertainty of the estimates (e.g. uncertainty intervals).                                                                                                                                                                         | Main text: Results                                                                          |
| 17                            | Interpret results in light of existing evidence. If updating a previous set of estimates, describe the reasons for changes in estimates.                                                                                                                                | Main Text: Discussion                                                                       |
| 18                            | Discuss limitations of the estimates. Include a discussion of any modelling assumptions or data limitations that affect interpretation of the estimates.                                                                                                                | Main Text: Limitations                                                                      |

## Section 3: Data inputs

### 3.1 Death model inputs

*Description of all dependent and independent variables explored in the death regression analysis, including mathematical transformations, relevant time period, control variables, and data sources.*

| Variable name                               | Definition                                                                                                                                                                                                                                                                         | Category           | Transformation | Analysis Time Period | Dependent variable transformation     | Controls      | Source                                           |
|---------------------------------------------|------------------------------------------------------------------------------------------------------------------------------------------------------------------------------------------------------------------------------------------------------------------------------------|--------------------|----------------|----------------------|---------------------------------------|---------------|--------------------------------------------------|
| <b>Deaths</b>                               | Age-standardised cumulative deaths per capita                                                                                                                                                                                                                                      | Dependent variable | Log            | NA                   | NA                                    | NA            | IHME COVID estimate, based on reporting from JHU |
| <b>Population density</b>                   | Proportion of the population living in an area with at least 500 ppl per sq km, 2019                                                                                                                                                                                               | Control            | Normalize      | NA                   | NA                                    | NA            | US Census Bureau; TIGERLS                        |
| <b>Comorbid conditions and risk factors</b> | First principal component of a PCA of the following conditions and behaviors: asthma, cancer, chronic obstructive pulmonary disease (COPD), cardiovascular disease, diabetes, body-mass index (BMI), and smoking. Each condition was expressed as the age-standardised prevalence. | Control            | Normalize      | NA                   | NA                                    | NA            | GBD 2019                                         |
| <b>Hispanic</b>                             | Proportion of the population identifying as Hispanic                                                                                                                                                                                                                               | Race/<br>Ethnicity | Normalize      | 1/1/20 - 7/31/22     | log(cumulative infections per capita) | comorbidities | US Census Bureau                                 |
| <b>Non-Hispanic Asian</b>                   | Proportion of the population identifying as non-Hispanic and Asian or Pacific Islander                                                                                                                                                                                             | Race/<br>Ethnicity | Normalize      | 1/1/20 - 7/31/22     | log(cumulative infections per capita) | comorbidities | US Census Bureau                                 |
| <b>Non-Hispanic Black</b>                   | Proportion of the population identifying as non-Hispanic and Black                                                                                                                                                                                                                 | Race/<br>Ethnicity | Normalize      | 1/1/20 - 7/31/22     | log(cumulative infections per capita) | comorbidities | US Census Bureau                                 |

|                                     |                                                                                               |                                      |           |                     |                                             |               |                                                           |
|-------------------------------------|-----------------------------------------------------------------------------------------------|--------------------------------------|-----------|---------------------|---------------------------------------------|---------------|-----------------------------------------------------------|
| <b>Non-Hispanic White</b>           | Proportion of the population identifying as non-Hispanic and White                            | Race/<br>Ethnicity                   | Normalize | 1/1/20 -<br>7/31/22 | log(cumulative<br>infections per<br>capita) | comorbidities | US Census Bureau                                          |
| <b>Non-Hispanic American Indian</b> | Proportion of the population identifying as non-Hispanic and American Indian or Alaska Native | Race/<br>Ethnicity                   | Normalize | 1/1/20 -<br>7/31/22 | log(cumulative<br>infections per<br>capita) | comorbidities | US Census Bureau                                          |
| <b>Poverty</b>                      | % of the population living below the poverty line, 2019                                       | Pre-COVID<br>state<br>characteristic | Normalize | 1/1/20 -<br>7/31/22 | log(cumulative<br>infections per<br>capita) | comorbidities | GBD 2019                                                  |
| <b>Income inequality</b>            | Gini coefficient, 2019                                                                        | Pre-COVID<br>state<br>characteristic | Normalize | 1/1/20 -<br>7/31/22 | log(cumulative<br>infections per<br>capita) | comorbidities | US Census Bureau                                          |
| <b>Health access and quality</b>    | Health access and quality index (HAQI), 2019                                                  | Pre-COVID<br>state<br>characteristic | Normalize | 1/1/20 -<br>7/31/22 | log(cumulative<br>infections per<br>capita) | comorbidities | GBD 2019                                                  |
| <b>Public health FTEs</b>           | Public health full-time equivalent (FTE) hours per capita, 2019                               | Pre-COVID<br>state<br>characteristic | Normalize | 1/1/20 -<br>7/31/22 | log(cumulative<br>infections per<br>capita) | comorbidities | US Census: State<br>Government<br>Employment &<br>Payroll |
| <b>Public health spending</b>       | Price-adjusted public health spending per capita, 2019                                        | Pre-COVID<br>state<br>characteristic | Normalize | 1/1/20 -<br>7/31/22 | log(cumulative<br>infections per<br>capita) | comorbidities | State Health Access<br>Data Assistance<br>Center (SHADAC) |
| <b>Health spending</b>              | Price-adjusted health spending per capita, 2019                                               | Pre-COVID<br>state<br>characteristic | Normalize | 1/1/20 -<br>7/31/22 | log(cumulative<br>infections per<br>capita) | comorbidities | CMS State Health<br>Expenditure<br>Accounts               |
| <b>Hospital beds</b>                | Hospital beds per capita, 2019                                                                | Pre-COVID<br>state<br>characteristic | Normalize | 1/1/20 -<br>7/31/22 | log(cumulative<br>infections per<br>capita) | comorbidities | Kaiser Family<br>Foundation                               |
| <b>ICU beds</b>                     | ICU beds per capita, 2019                                                                     | Pre-COVID<br>state<br>characteristic | Normalize | 1/1/20 -<br>7/31/22 | log(cumulative<br>infections per<br>capita) | comorbidities | Kaiser Family<br>Foundation                               |



|                                   |                                                                                 |                                |           |                  |                                       |               |                                                            |
|-----------------------------------|---------------------------------------------------------------------------------|--------------------------------|-----------|------------------|---------------------------------------|---------------|------------------------------------------------------------|
| <b>Physicians</b>                 | Physicians per capita, 2019                                                     | Pre-COVID state characteristic | Normalize | 1/1/20 - 7/31/22 | log(cumulative infections per capita) | comorbidities | Kaiser Family Foundation                                   |
| <b>Healthcare workers</b>         | Healthcare workers per capita, 2019                                             | Pre-COVID state characteristic | Normalize | 1/1/20 - 7/31/22 | log(cumulative infections per capita) | comorbidities | Kaiser Family Foundation                                   |
| <b>Health insurance</b>           | Proportion of the population who are uninsured, 2019                            | Pre-COVID state characteristic | Normalize | 1/1/20 - 7/31/22 | log(cumulative infections per capita) | comorbidities | US Census: Smaller Area Health Insurance Estimates         |
| <b>Governor party affiliation</b> | Governor's political party affiliation (Republican/Democrat), 2019              | Pre-COVID state characteristic | None      | 1/1/20 - 7/31/22 | log(cumulative infections per capita) | comorbidities | Harvard Dataverse                                          |
| <b>Vote share (2020)</b>          | % of the vote that went for the Republican presidential candidate in 2020       | Pre-COVID state characteristic | Normalize | 1/1/20 - 7/31/22 | log(cumulative infections per capita) | comorbidities | Harvard Dataverse                                          |
| <b>Interpersonal trust</b>        | Most people can be trusted                                                      | Pre-COVID state characteristic | Normalize | 1/1/20 - 7/31/22 | log(cumulative infections per capita) | comorbidities | 2016/2018 Cooperative Congressional Election Survey (CCES) |
| <b>Trust in science</b>           | A lot or moderate amount of trust in the scientific community                   | Pre-COVID state characteristic | Normalize | 1/1/20 - 7/31/22 | log(cumulative infections per capita) | comorbidities | 2018 Cooperative Congressional Election Survey (CCES)      |
| <b>Trust in government</b>        | Always or almost always trust the federal government to do what is right        | Pre-COVID state characteristic | Normalize | 1/1/20 - 7/31/22 | log(cumulative infections per capita) | comorbidities | 2016/2018 Cooperative Congressional Election Survey (CCES) |
| <b>Paid family/sick leave</b>     | Existence of state-funded paid family or medical leave (Neither/One/Both), 2019 | Pre-COVID state characteristic | None      | 1/1/20 - 7/31/22 | log(cumulative infections per capita) | comorbidities | Kaiser Family Foundation                                   |
| <b>Education</b>                  | Average years of education, 2019                                                | Pre-COVID state characteristic | Normalize | 1/1/20 - 7/31/22 | log(cumulative infections per capita) | comorbidities | American Community Survey                                  |

|                           |                                                                                                                                                                                                                                                  |              |      |                 |                                        |                                           |                                                                                                                                                                                                                                                                                                                                                                                                                                                                                                                                                    |
|---------------------------|--------------------------------------------------------------------------------------------------------------------------------------------------------------------------------------------------------------------------------------------------|--------------|------|-----------------|----------------------------------------|-------------------------------------------|----------------------------------------------------------------------------------------------------------------------------------------------------------------------------------------------------------------------------------------------------------------------------------------------------------------------------------------------------------------------------------------------------------------------------------------------------------------------------------------------------------------------------------------------------|
| <b>Mandate propensity</b> | First principal component of a PCA of the following variables: mask mandates, stay-at-home orders, restaurant closures, bar closures, gathering restrictions, primary school closures, higher education closures, and gym/pool/leisure closures. | COVID policy | None | 4/1/20 - 6/1/21 | mean(log(daily infections per capita)) | comorbidities                             | <i>Constructed</i>                                                                                                                                                                                                                                                                                                                                                                                                                                                                                                                                 |
| <b>Mask mandates</b>      | % of days during the analysis time period with a mask mandate in effect                                                                                                                                                                          | COVID policy | None | 4/1/20 - 6/1/21 | mean(log(daily infections per capita)) | comorbidities + leave-one-out mandate pca | COVID19StatePolicy.org; Christopher Adolph, Kenya Amano, Bree Bang-Jensen, Nancy Fullman, John Wilkerson. 2021. "Pandemic Politics: Timing State-Level Social Distancing Responses to COVID-19." Journal of Health Politics, Policy and Law; Christopher Adolph, Kenya Amano, Bree Bang-Jensen, Nancy Fullman, Beatrice Magistro, Grace Reinke, Rachel Castellano, Megan Erickson, John Wilkerson. 2021. "The Pandemic Policy U-Turn: Partisanship, Public Health, and Race in Decisions to Ease COVID-19 Social Distancing Policies in the United |

States."  
 Perspectives on  
 Politics.

|                               |                                                                                                                                                              |              |      |                 |                                        |                                           |
|-------------------------------|--------------------------------------------------------------------------------------------------------------------------------------------------------------|--------------|------|-----------------|----------------------------------------|-------------------------------------------|
| <b>Stay at home orders</b>    | % of days during the analysis time period with a stay-at-home order in effect                                                                                | COVID policy | None | 4/1/20 - 6/1/21 | mean(log(daily infections per capita)) | comorbidities + leave-one-out mandate pca |
| <b>Restaurant closures</b>    | % of days during the analysis time period with restaurants mandated shut                                                                                     | COVID policy | None | 4/1/20 - 6/1/21 | mean(log(daily infections per capita)) | comorbidities + leave-one-out mandate pca |
| <b>Bar closures</b>           | % of days during the analysis time period with bars mandated shut                                                                                            | COVID policy | None | 4/1/20 - 6/1/21 | mean(log(daily infections per capita)) | comorbidities + leave-one-out mandate pca |
| <b>Gathering restrictions</b> | % of days during the analysis time period with restrictions in place for indoor gatherings of 50 people or more and outdoor gatherings of 100 people or more | COVID policy | None | 4/1/20 - 6/1/21 | mean(log(daily infections per capita)) | comorbidities + leave-one-out mandate pca |

|                                            |                                                                                                                     |                |                       |                    |                                        |                                           |                                                                                                                                                                                                                                     |
|--------------------------------------------|---------------------------------------------------------------------------------------------------------------------|----------------|-----------------------|--------------------|----------------------------------------|-------------------------------------------|-------------------------------------------------------------------------------------------------------------------------------------------------------------------------------------------------------------------------------------|
| <b>Primary school closures</b>             | % of days during the analysis time period with primary schools mandated shut for in-person activities               | COVID policy   | None                  | 4/1/20 - 6/1/21    | mean(log(daily infections per capita)) | comorbidities + leave-one-out mandate pca |                                                                                                                                                                                                                                     |
| <b>Higher education closures</b>           | % of days during the analysis time period with higher education institutions mandated shut for in-person activities | COVID policy   | None                  | 4/1/20 - 6/1/21    | mean(log(daily infections per capita)) | comorbidities + leave-one-out mandate pca |                                                                                                                                                                                                                                     |
| <b>Gym/pool/leisure closures</b>           | % of days during the analysis time period with gyms, pools, and other leisure destinations mandated shut            | COVID policy   | None                  | 4/1/20 - 6/1/21    | mean(log(daily infections per capita)) | comorbidities + leave-one-out mandate pca |                                                                                                                                                                                                                                     |
| <b>Vaccine mandates (school employees)</b> | History of COVID vaccine mandate for school employees (Yes/No)                                                      | COVID policy   | None                  | 3/15/21 - 07/31/22 | log(cumulative infections per capita)  | comorbidities + leave-one-out mandate pca | Kaiser Family Foundation                                                                                                                                                                                                            |
| <b>Vaccine mandates (state employees)</b>  | History of COVID vaccine mandate for state employees (Yes/No/Partial)                                               | COVID policy   | None                  | 3/15/21 - 07/31/22 | log(cumulative infections per capita)  | comorbidities + leave-one-out mandate pca | Kaiser Family Foundation                                                                                                                                                                                                            |
| <b>Mask use</b>                            | Average proportion of the population who always wear a mask when leaving home                                       | COVID behavior | Mean of daily measure | 4/1/20 - 07/31/22  | mean(log(daily infections per capita)) | comorbidities                             | IHME COVID-19 database                                                                                                                                                                                                              |
| <b>Mobility</b>                            | Average daily relative change in mobility from pre-pandemic baseline                                                | COVID behavior | Mean of daily measure | 4/1/20 - 07/31/22  | mean(log(daily infections per capita)) | comorbidities                             | Google Global COVID-19 Community Mobility Report; Apple Inc. COVID-19 Mobility Trends Report; United States Mobility Changes in Response to COVID-19 2020 - Descartes Labs; United States SafeGraph Social Distancing Metrics 2020. |

|                       |                                                                                                                                                                                          |                |      |                    |                                        |               |                        |
|-----------------------|------------------------------------------------------------------------------------------------------------------------------------------------------------------------------------------|----------------|------|--------------------|----------------------------------------|---------------|------------------------|
| <b>Vaccine uptake</b> | Age-standardized fully vaccinated person-days per total person-days, where fully vaccinated is defined as receiving 2 doses of a two-dose regimen or a single dose of a one-dose regimen | COVID behavior | None | 3/15/21 - 07/31/22 | mean(log(daily infections per capita)) | comorbidities | IHME COVID-19 database |
|-----------------------|------------------------------------------------------------------------------------------------------------------------------------------------------------------------------------------|----------------|------|--------------------|----------------------------------------|---------------|------------------------|

### 3.2 Infection model inputs

*Description of all dependent and independent variables explored in the infection regression analysis, including mathematical transformations, relevant time period, control variables, and data sources.*

| Variable name                       | Definition                                                                                    | Category                       | Transformation | Analysis Time Period | Dependent variable transformation     | Controls           | Source                                                |
|-------------------------------------|-----------------------------------------------------------------------------------------------|--------------------------------|----------------|----------------------|---------------------------------------|--------------------|-------------------------------------------------------|
| <b>Infections</b>                   | Cumulative infections per capita                                                              | Dependent variable             | Log            | NA                   | NA                                    | NA                 | IHME COVID estimate, based on case reporting from JHU |
| <b>Population density</b>           | Proportion of the population living in an area with at least 500 ppl per sq km, 2019          | Control                        | Normalize      | NA                   | NA                                    | NA                 | US Census Bureau; TIGERLS                             |
| <b>Hispanic</b>                     | Proportion of the population identifying as Hispanic                                          | Race/<br>Ethnicity             | Normalize      | 1/1/20 - 12/15/21    | log(cumulative infections per capita) | population density | US Census Bureau                                      |
| <b>Non-Hispanic Asian</b>           | Proportion of the population identifying as non-Hispanic and Asian or Pacific Islander        | Race/<br>Ethnicity             | Normalize      | 1/1/20 - 12/15/21    | log(cumulative infections per capita) | population density | US Census Bureau                                      |
| <b>Non-Hispanic Black</b>           | Proportion of the population identifying as non-Hispanic and Black                            | Race/<br>Ethnicity             | Normalize      | 1/1/20 - 12/15/21    | log(cumulative infections per capita) | population density | US Census Bureau                                      |
| <b>Non-Hispanic White</b>           | Proportion of the population identifying as non-Hispanic and White                            | Race/<br>Ethnicity             | Normalize      | 1/1/20 - 12/15/21    | log(cumulative infections per capita) | population density | US Census Bureau                                      |
| <b>Non-Hispanic American Indian</b> | Proportion of the population identifying as non-Hispanic and American Indian or Alaska Native | Race/<br>Ethnicity             | Normalize      | 1/1/20 - 12/15/21    | log(cumulative infections per capita) | population density | US Census Bureau                                      |
| <b>Poverty</b>                      | % of the population living below the poverty line, 2019                                       | Pre-COVID state characteristic | Normalize      | 1/1/20 - 12/15/21    | log(cumulative infections per capita) | population density | GBD 2019                                              |
| <b>Income inequality</b>            | Gini coefficient, 2019                                                                        | Pre-COVID state characteristic | Normalize      | 1/1/20 - 12/15/21    | log(cumulative infections per capita) | population density | US Census Bureau                                      |

|                                   |                                                                                                                                                                                                                                                  |                                |           |                   |                                        |                                                  |                                                                                                |
|-----------------------------------|--------------------------------------------------------------------------------------------------------------------------------------------------------------------------------------------------------------------------------------------------|--------------------------------|-----------|-------------------|----------------------------------------|--------------------------------------------------|------------------------------------------------------------------------------------------------|
| <b>Health access and quality</b>  | Health access and quality index (HAQI), 2019                                                                                                                                                                                                     | Pre-COVID state characteristic | Normalize | 1/1/20 - 12/15/21 | log(cumulative infections per capita)  | population density                               | GBD 2019                                                                                       |
| <b>Public health FTEs</b>         | Public health full-time equivalent (FTE) hours per capita, 2019                                                                                                                                                                                  | Pre-COVID state characteristic | Normalize | 1/1/20 - 12/15/21 | log(cumulative infections per capita)  | population density                               | US Census: State Government Employment & Payroll                                               |
| <b>Governor party affiliation</b> | Governor's political party affiliation (Republican/Democrat), 2019                                                                                                                                                                               | Pre-COVID state characteristic | None      | 1/1/20 - 12/15/21 | log(cumulative infections per capita)  | population density                               | Harvard Dataverse                                                                              |
| <b>Vote share (2020)</b>          | % of the vote that went for the Republican presidential candidate in 2020                                                                                                                                                                        | Pre-COVID state characteristic | Normalize | 1/1/20 - 12/15/21 | log(cumulative infections per capita)  | population density                               | Harvard Dataverse                                                                              |
| <b>Interpersonal trust</b>        | Most people can be trusted                                                                                                                                                                                                                       | Pre-COVID state characteristic | Normalize | 1/1/20 - 12/15/21 | log(cumulative infections per capita)  | population density                               | 2016/2018 Cooperative Congressional Election Survey (CCES)                                     |
| <b>Trust in science</b>           | A lot or moderate amount of trust in the scientific community                                                                                                                                                                                    | Pre-COVID state characteristic | Normalize | 1/1/20 - 12/15/21 | log(cumulative infections per capita)  | population density                               | 2018 Cooperative Congressional Election Survey (CCES)                                          |
| <b>Trust in government</b>        | Always or almost always trust the federal government to do what is right                                                                                                                                                                         | Pre-COVID state characteristic | Normalize | 1/1/20 - 12/15/21 | log(cumulative infections per capita)  | population density                               | 2016/2018 Cooperative Congressional Election Survey (CCES)                                     |
| <b>Paid family/sick leave</b>     | Existence of state-funded paid family or medical leave (Neither/One/Both), 2019                                                                                                                                                                  | Pre-COVID state characteristic | None      | 1/1/20 - 12/15/21 | log(cumulative infections per capita)  | population density                               | Kaiser Family Foundation                                                                       |
| <b>Education</b>                  | Average years of education, 2019                                                                                                                                                                                                                 | Pre-COVID state characteristic | Normalize | 1/1/20 - 12/15/21 | log(cumulative infections per capita)  | population density                               | American Community Survey                                                                      |
| <b>Mandate propensity</b>         | First principal component of a PCA of the following variables: mask mandates, stay-at-home orders, restaurant closures, bar closures, gathering restrictions, primary school closures, higher education closures, and gym/pool/leisure closures. | COVID policy                   | None      | 4/1/20 - 6/1/21   | mean(log(daily infections per capita)) | population density                               | <i>Constructed</i>                                                                             |
| <b>Mask mandates</b>              | % of days during the analysis time period with a mask mandate in effect                                                                                                                                                                          | COVID policy                   | None      | 4/1/20 - 6/1/21   | mean(log(daily infections per capita)) | proportion_500ppl_km + leave-one-out mandate pca | COVID19StatePolicy.org; Christopher Adolph, Kenya Amano, Bree Bang-Jensen, Nancy Fullman, John |

Wilkerson. 2021. "Pandemic Politics: Timing State-Level Social Distancing Responses to COVID-19." Journal of Health Politics, Policy and Law; Christopher Adolph, Kenya Amano, Bree Bang-Jensen, Nancy Fullman, Beatrice Magistro, Grace Reinke, Rachel Castellano, Megan Erickson, John Wilkerson. 2021. "The Pandemic Policy U-Turn: Partisanship, Public Health, and Race in Decisions to Ease COVID-19 Social Distancing Policies in the United States." Perspectives on Politics.

|                                |                                                                                                                                                              |              |      |                 |                                        |                                                  |
|--------------------------------|--------------------------------------------------------------------------------------------------------------------------------------------------------------|--------------|------|-----------------|----------------------------------------|--------------------------------------------------|
| <b>Stay at home orders</b>     | % of days during the analysis time period with a stay-at-home order in effect                                                                                | COVID policy | None | 4/1/20 - 6/1/21 | mean(log(daily infections per capita)) | proportion_500ppl_km + leave-one-out mandate pca |
| <b>Restaurant closures</b>     | % of days during the analysis time period with restaurants mandated shut                                                                                     | COVID policy | None | 4/1/20 - 6/1/21 | mean(log(daily infections per capita)) | proportion_500ppl_km + leave-one-out mandate pca |
| <b>Bar closures</b>            | % of days during the analysis time period with bars mandated shut                                                                                            | COVID policy | None | 4/1/20 - 6/1/21 | mean(log(daily infections per capita)) | proportion_500ppl_km + leave-one-out mandate pca |
| <b>Gathering restrictions</b>  | % of days during the analysis time period with restrictions in place for indoor gatherings of 50 people or more and outdoor gatherings of 100 people or more | COVID policy | None | 4/1/20 - 6/1/21 | mean(log(daily infections per capita)) | proportion_500ppl_km + leave-one-out mandate pca |
| <b>Primary school closures</b> | % of days during the analysis time period with primary schools mandated shut for in-person activities                                                        | COVID policy | None | 4/1/20 - 6/1/21 | mean(log(daily infections per capita)) | proportion_500ppl_km + leave-one-out mandate pca |



|                                            |                                                                                                                                                                         |                |                       |                    |                                        |                                                  |                                                                                                                                                                                                                                     |
|--------------------------------------------|-------------------------------------------------------------------------------------------------------------------------------------------------------------------------|----------------|-----------------------|--------------------|----------------------------------------|--------------------------------------------------|-------------------------------------------------------------------------------------------------------------------------------------------------------------------------------------------------------------------------------------|
| <b>Higher education closures</b>           | % of days during the analysis time period with higher education institutions mandated shut for in-person activities                                                     | COVID policy   | None                  | 4/1/20 - 6/1/21    | mean(log(daily infections per capita)) | proportion_500ppl_km + leave-one-out mandate pca |                                                                                                                                                                                                                                     |
| <b>Gym/pool/leisure closures</b>           | % of days during the analysis time period with gyms, pools, and other leisure destinations mandated shut                                                                | COVID policy   | None                  | 4/1/20 - 6/1/21    | mean(log(daily infections per capita)) | proportion_500ppl_km + leave-one-out mandate pca |                                                                                                                                                                                                                                     |
| <b>Vaccine mandates (school employees)</b> | History of COVID vaccine mandate for school employees (Yes/No)                                                                                                          | COVID policy   | None                  | 3/15/21 - 12/15/21 | log(cumulative infections per capita)  | proportion_500ppl_km + leave-one-out mandate pca | Kaiser Family Foundation                                                                                                                                                                                                            |
| <b>Vaccine mandates (state employees)</b>  | History of COVID vaccine mandate for state employees (Yes/No/Partial)                                                                                                   | COVID policy   | None                  | 3/15/21 - 12/15/21 | log(cumulative infections per capita)  | proportion_500ppl_km + leave-one-out mandate pca | Kaiser Family Foundation                                                                                                                                                                                                            |
| <b>Mask use</b>                            | Average proportion of the population who always wear a mask when leaving home                                                                                           | COVID behavior | Mean of daily measure | 4/1/20 - 12/15/21  | mean(log(daily infections per capita)) | population density                               | IHME COVID-19 database                                                                                                                                                                                                              |
| <b>Mobility</b>                            | Average daily relative change in mobility from pre-pandemic baseline                                                                                                    | COVID behavior | Mean of daily measure | 4/1/20 - 12/15/21  | mean(log(daily infections per capita)) | population density                               | Google Global COVID-19 Community Mobility Report; Apple Inc. COVID-19 Mobility Trends Report; United States Mobility Changes in Response to COVID-19 2020 - Descartes Labs; United States SafeGraph Social Distancing Metrics 2020. |
| <b>Vaccine uptake</b>                      | Fully vaccinated person-days per total person-days, where fully vaccinated is defined as receiving 2 doses of a two-dose regimen or a single dose of a one-dose regimen | COVID behavior | None                  | 3/15/21 - 12/15/21 | mean(log(daily infections per capita)) | population density                               | IHME COVID-19 database                                                                                                                                                                                                              |

### 3.3 GDP model inputs

*Description of all dependent and independent variables explored in the GDP regression analysis, including mathematical transformations, relevant time period, control variables, and data sources.*

| <b>Variable name</b>                          | <b>Definition</b>                                                 | <b>Category</b>    | <b>Transformation</b> | <b>Analysis Time Period</b> | <b>Dependent variable transformation</b> | <b>Controls</b> | <b>Source</b>                                                                                                     |
|-----------------------------------------------|-------------------------------------------------------------------|--------------------|-----------------------|-----------------------------|------------------------------------------|-----------------|-------------------------------------------------------------------------------------------------------------------|
| <b>GDP</b>                                    | Sector-standardised GDP relative to 2019                          | Dependent variable | None                  | NA                          | NA                                       | NA              | Bureau of Economic Analysis (BEA)                                                                                 |
| <b>Education</b>                              | Average years of education, 2019                                  | Control            | Normalize             | NA                          | NA                                       | NA              | GBD 2019                                                                                                          |
| <b>Population 65+</b>                         | Proportion of the population aged 65 and up, 2019                 | Control            | Normalize             | NA                          | NA                                       | NA              | GBD 2019                                                                                                          |
| <b>Population &lt;20</b>                      | Proportion of the population under 20 years old, 2019             | Control            | Normalize             | NA                          | NA                                       | NA              | GBD 2019                                                                                                          |
| <b>Unemployment insurance, benefit length</b> | Average length (in weeks) of unemployment insurance benefit, 2019 | Control            | Normalize             | NA                          | NA                                       | NA              | US Department of Labor, Center on Budget and Policy Priorities, Missouri Economic Research and Information Center |

|                                               |                                                                                 |                                |           |                  |                                       |                                                                                              |                                                                                                                   |
|-----------------------------------------------|---------------------------------------------------------------------------------|--------------------------------|-----------|------------------|---------------------------------------|----------------------------------------------------------------------------------------------|-------------------------------------------------------------------------------------------------------------------|
| <b>Unemployment insurance, benefit amount</b> | Average price-adjusted unemployment insurance benefit amount (in dollars), 2019 | Control                        | Normalize | NA               | NA                                    | NA                                                                                           | US Department of Labor, Center on Budget and Policy Priorities, Missouri Economic Research and Information Center |
| <b>Poverty</b>                                | % of the population living below the poverty line, 2019                         | Pre-COVID state characteristic | Normalize | 1/1/20 - 6/30/22 | log(cumulative infections per capita) | education + population over 65 + population under 20 + UI benefit length + UI benefit amount | GBD 2019                                                                                                          |
| <b>Income inequality</b>                      | Gini coefficient, 2019                                                          | Pre-COVID state characteristic | Normalize | 1/1/20 - 6/30/22 | log(cumulative infections per capita) | education + population over 65 + population under 20 + UI benefit length + UI benefit amount | US Census Bureau                                                                                                  |
| <b>Governor party affiliation</b>             | Governor's political party affiliation (Republican/Democrat), 2019              | Pre-COVID state characteristic | None      | 1/1/20 - 6/30/22 | log(cumulative infections per capita) | education + population over 65 + population under 20 + UI benefit length + UI benefit amount | Harvard Dataverse                                                                                                 |

|                            |                                                                           |                                |           |                  |                                       |                                                                                              |                                                            |
|----------------------------|---------------------------------------------------------------------------|--------------------------------|-----------|------------------|---------------------------------------|----------------------------------------------------------------------------------------------|------------------------------------------------------------|
| <b>Vote share (2020)</b>   | % of the vote that went for the Republican presidential candidate in 2020 | Pre-COVID state characteristic | Normalize | 1/1/20 - 6/30/22 | log(cumulative infections per capita) | education + population over 65 + population under 20 + UI benefit length + UI benefit amount | Harvard Dataverse                                          |
| <b>Interpersonal trust</b> | Most people can be trusted                                                | Pre-COVID state characteristic | Normalize | 1/1/20 - 6/30/22 | log(cumulative infections per capita) | education + population over 65 + population under 20 + UI benefit length + UI benefit amount | 2016/2018 Cooperative Congressional Election Survey (CCES) |
| <b>Trust in science</b>    | A lot or moderate amount of trust in the scientific community             | Pre-COVID state characteristic | Normalize | 1/1/20 - 6/30/22 | log(cumulative infections per capita) | education + population over 65 + population under 20 + UI benefit length + UI benefit amount | 2018 Cooperative Congressional Election Survey (CCES)      |
| <b>Trust in government</b> | Always or almost always trust the federal government to do what is right  | Pre-COVID state characteristic | Normalize | 1/1/20 - 6/30/22 | log(cumulative infections per capita) | education + population over 65 + population under 20 + UI benefit length + UI benefit amount | 2016/2018 Cooperative Congressional Election Survey (CCES) |

|                               |                                                                                                                                                                                                                                                  |                                |      |                  |                                        |                                                                                                                          |                                                                                                                                                                                              |
|-------------------------------|--------------------------------------------------------------------------------------------------------------------------------------------------------------------------------------------------------------------------------------------------|--------------------------------|------|------------------|----------------------------------------|--------------------------------------------------------------------------------------------------------------------------|----------------------------------------------------------------------------------------------------------------------------------------------------------------------------------------------|
| <b>Paid family/sick leave</b> | Existence of state-funded paid family or medical leave (Neither/One/Both), 2019                                                                                                                                                                  | Pre-COVID state characteristic | None | 1/1/20 - 6/30/22 | log(cumulative infections per capita)  | education + population over 65 + population under 20 + UI benefit length + UI benefit amount                             | Kaiser Family Foundation                                                                                                                                                                     |
| <b>Mandate propensity</b>     | First principal component of a PCA of the following variables: mask mandates, stay-at-home orders, restaurant closures, bar closures, gathering restrictions, primary school closures, higher education closures, and gym/pool/leisure closures. | COVID policy                   | None | 4/1/20 - 6/1/21  | mean(log(daily infections per capita)) | population density + comorbidities                                                                                       | <i>Constructed</i>                                                                                                                                                                           |
| <b>Mask mandates</b>          | % of days during the analysis time period with a mask mandate in effect                                                                                                                                                                          | COVID policy                   | None | 4/1/20 - 6/1/21  | mean(log(daily infections per capita)) | education + population over 65 + population under 20 + UI benefit length + UI benefit amount + leave-one-out mandate PCA | COVID19StatePolicy.org; Christopher Adolph, Kenya Amano, Bree Bang-Jensen, Nancy Fullman, John Wilkerson. 2021. "Pandemic Politics: Timing State-Level Social Distancing Responses to COVID- |

|                               |                                                                                                                                                              |              |      |                 |                                        |                                                                                                                          |                                                                                                                                                                                                                                                                                                                                                                                           |
|-------------------------------|--------------------------------------------------------------------------------------------------------------------------------------------------------------|--------------|------|-----------------|----------------------------------------|--------------------------------------------------------------------------------------------------------------------------|-------------------------------------------------------------------------------------------------------------------------------------------------------------------------------------------------------------------------------------------------------------------------------------------------------------------------------------------------------------------------------------------|
| <b>Stay at home orders</b>    | % of days during the analysis time period with a stay-at-home order in effect                                                                                | COVID policy | None | 4/1/20 - 6/1/21 | mean(log(daily infections per capita)) | education + population over 65 + population under 20 + UI benefit length + UI benefit amount + leave-one-out mandate PCA | 19." Journal of Health Politics, Policy and Law; Christopher Adolph, Kenya Amano, Bree Bang-Jensen, Nancy Fullman, Beatrice Magistro, Grace Reinke, Rachel Castellano, Megan Erickson, John Wilkerson. 2021. "The Pandemic Policy U-Turn: Partisanship, Public Health, and Race in Decisions to Ease COVID-19 Social Distancing Policies in the United States." Perspectives on Politics. |
| <b>Restaurant closures</b>    | % of days during the analysis time period with restaurants mandated shut                                                                                     | COVID policy | None | 4/1/20 - 6/1/21 | mean(log(daily infections per capita)) | education + population over 65 + population under 20 + UI benefit length + UI benefit amount + leave-one-out mandate PCA |                                                                                                                                                                                                                                                                                                                                                                                           |
| <b>Bar closures</b>           | % of days during the analysis time period with bars mandated shut                                                                                            | COVID policy | None | 4/1/20 - 6/1/21 | mean(log(daily infections per capita)) | education + population over 65 + population under 20 + UI benefit length + UI benefit amount + leave-one-out mandate PCA |                                                                                                                                                                                                                                                                                                                                                                                           |
| <b>Gathering restrictions</b> | % of days during the analysis time period with restrictions in place for indoor gatherings of 50 people or more and outdoor gatherings of 100 people or more | COVID policy | None | 4/1/20 - 6/1/21 | mean(log(daily infections per capita)) | education + population over 65 + population under 20 + UI benefit length + UI benefit amount +                           |                                                                                                                                                                                                                                                                                                                                                                                           |

|                                      |                                                                                                                                    |              |      |                    |                                              |                                                                                                                                                     |                              |  |
|--------------------------------------|------------------------------------------------------------------------------------------------------------------------------------|--------------|------|--------------------|----------------------------------------------|-----------------------------------------------------------------------------------------------------------------------------------------------------|------------------------------|--|
|                                      |                                                                                                                                    |              |      |                    |                                              |                                                                                                                                                     | leave-one-out<br>mandate PCA |  |
| <b>Primary school<br/>closures</b>   | % of days during the<br>analysis time period<br>with primary schools<br>mandated shut for in-<br>person activities                 | COVID policy | None | 4/1/20 -<br>6/1/21 | mean(log(daily<br>infections per<br>capita)) | education +<br>population<br>over 65 +<br>population<br>under 20 + UI<br>benefit length<br>+ UI benefit<br>amount +<br>leave-one-out<br>mandate PCA |                              |  |
| <b>Higher education<br/>closures</b> | % of days during the<br>analysis time period<br>with higher education<br>institutions mandated<br>shut for in-person<br>activities | COVID policy | None | 4/1/20 -<br>6/1/21 | mean(log(daily<br>infections per<br>capita)) | education +<br>population<br>over 65 +<br>population<br>under 20 + UI<br>benefit length<br>+ UI benefit<br>amount +<br>leave-one-out<br>mandate PCA |                              |  |
| <b>Gym/pool/leisure<br/>closures</b> | % of days during the<br>analysis time period<br>with gyms, pools, and<br>other leisure<br>destinations mandated<br>shut            | COVID policy | None | 4/1/20 -<br>6/1/21 | mean(log(daily<br>infections per<br>capita)) | education +<br>population<br>over 65 +<br>population<br>under 20 + UI<br>benefit length<br>+ UI benefit<br>amount +<br>leave-one-out<br>mandate PCA |                              |  |

|                                                        |                                                                                 |              |      |                    |                                        |                                                                                              |                                                                                                                   |
|--------------------------------------------------------|---------------------------------------------------------------------------------|--------------|------|--------------------|----------------------------------------|----------------------------------------------------------------------------------------------|-------------------------------------------------------------------------------------------------------------------|
| <b>Federal unemployment insurance benefit duration</b> | Average length (in weeks) of unemployment insurance benefit, 2019               | COVID policy | None | 4/1/20 - 06/30/22  | mean(log(daily infections per capita)) | education + population over 65 + population under 20 + UI benefit length + UI benefit amount | US Department of Labor, Center on Budget and Policy Priorities, Missouri Economic Research and Information Center |
| <b>Federal unemployment insurance benefit amount</b>   | Average price-adjusted unemployment insurance benefit amount (in dollars), 2019 | COVID policy | None | 4/1/20 - 06/30/22  | mean(log(daily infections per capita)) | education + population over 65 + population under 20 + UI benefit length + UI benefit amount | US Department of Labor, Center on Budget and Policy Priorities, Missouri Economic Research and Information Center |
| <b>Vaccine mandates (school employees)</b>             | History of COVID vaccine mandate for school employees (Yes/No)                  | COVID policy | None | 3/15/21 - 06/30/22 | log(cumulative infections per capita)  | education + population over 65 + population under 20 + UI benefit length + UI benefit amount | Kaiser Family Foundation                                                                                          |
| <b>Vaccine mandates (state employees)</b>              | History of COVID vaccine mandate for state employees (Yes/No/Partial)           | COVID policy | None | 3/15/21 - 06/30/22 | log(cumulative infections per capita)  | education + population over 65 + population under 20 + UI benefit length + UI benefit amount | Kaiser Family Foundation                                                                                          |



|                       |                                                                                                                                                                         |                |      |                    |                                        |                                                                                              |                                                                                                                                                                                                                                     |
|-----------------------|-------------------------------------------------------------------------------------------------------------------------------------------------------------------------|----------------|------|--------------------|----------------------------------------|----------------------------------------------------------------------------------------------|-------------------------------------------------------------------------------------------------------------------------------------------------------------------------------------------------------------------------------------|
| <b>Mask use</b>       | Average proportion of the population who always wear a mask when leaving home                                                                                           | COVID behavior | None | 4/1/20 - 06/30/22  | mean(log(daily infections per capita)) | education + population over 65 + population under 20 + UI benefit length + UI benefit amount | IHME COVID-19 database                                                                                                                                                                                                              |
| <b>Mobility</b>       | Average daily relative change in mobility from pre-pandemic baseline                                                                                                    | COVID behavior | None | 4/1/20 - 06/30/22  | mean(log(daily infections per capita)) | education + population over 65 + population under 20 + UI benefit length + UI benefit amount | Google Global COVID-19 Community Mobility Report; Apple Inc. COVID-19 Mobility Trends Report; United States Mobility Changes in Response to COVID-19 2020 - Descartes Labs; United States SafeGraph Social Distancing Metrics 2020. |
| <b>Vaccine uptake</b> | Fully vaccinated person-days per total person-days, where fully vaccinated is defined as receiving 2 doses of a two-dose regimen or a single dose of a one-dose regimen | COVID behavior | None | 3/15/21 - 06/30/22 | mean(log(daily infections per capita)) | education + population over 65 + population under 20 + UI benefit length + UI benefit amount | IHME COVID-19 database                                                                                                                                                                                                              |

|                         |                                          |                |                |                   |                                        |                                                                                              |                        |
|-------------------------|------------------------------------------|----------------|----------------|-------------------|----------------------------------------|----------------------------------------------------------------------------------------------|------------------------|
| <b>Infections</b>       | Cumulative infections per capita         | COVID outcomes | Log, Normalize | 4/1/20 - 12/15/21 | mean(log(daily infections per capita)) | education + population over 65 + population under 20 + UI benefit length + UI benefit amount | IHME COVID-19 database |
| <b>Deaths</b>           | Cumulative deaths per capita             | COVID outcomes | Log, Normalize | 4/1/20 - 06/30/22 | mean(log(daily infections per capita)) | education + population over 65 + population under 20 + UI benefit length + UI benefit amount | IHME COVID-19 database |
| <b>IFR</b>              | Age-standardised Infection-fatality rate | COVID outcomes | Normalize      | 4/1/20 - 12/15/21 | mean(log(daily infections per capita)) | education + population over 65 + population under 20 + UI benefit length + UI benefit amount | IHME COVID-19 database |
| <b>Hospitalisations</b> | Cumulative hospitalisations per capita   | COVID outcomes | Normalize      | 4/1/20 - 12/15/21 | mean(log(daily infections per capita)) | education + population over 65 + population under 20 + UI benefit length + UI benefit amount | IHME COVID-19 database |

### 3.4 Employment model inputs

*Description of all dependent and independent variables explored in the employment regression analysis, including mathematical transformations, relevant time period, control variables, and data sources.*

| Variable name                                 | Definition                                                                      | Category           | Transformation | Analysis Time Period | Dependent variable transformation | Controls | Source                                                                                                            |
|-----------------------------------------------|---------------------------------------------------------------------------------|--------------------|----------------|----------------------|-----------------------------------|----------|-------------------------------------------------------------------------------------------------------------------|
| <b>Employment</b>                             | Sector-standardised employment relative to 2019                                 | Dependent variable | None           | NA                   | NA                                | NA       | Bureau of Labor Statistics (accessed via Federal Reserve Economic Data)                                           |
| <b>Education</b>                              | Average years of education, 2019                                                | Control            | Normalize      | NA                   | NA                                | NA       | GBD 2019                                                                                                          |
| <b>Population 65+</b>                         | Proportion of the population aged 65 and up, 2019                               | Control            | Normalize      | NA                   | NA                                | NA       | GBD 2019                                                                                                          |
| <b>Population &lt;20</b>                      | Proportion of the population under 20 years old, 2019                           | Control            | Normalize      | NA                   | NA                                | NA       | GBD 2019                                                                                                          |
| <b>Unemployment insurance, benefit length</b> | Average length (in weeks) of unemployment insurance benefit, 2019               | Control            | Normalize      | NA                   | NA                                | NA       | US Department of Labor, Center on Budget and Policy Priorities, Missouri Economic Research and Information Center |
| <b>Unemployment insurance, benefit amount</b> | Average price-adjusted unemployment insurance benefit amount (in dollars), 2019 | Control            | Normalize      | NA                   | NA                                | NA       | US Department of Labor, Center on Budget and Policy Priorities, Missouri Economic Research and Information Center |

|                                   |                                                                           |                                |           |                  |                                       |                                                                                              |                                                            |
|-----------------------------------|---------------------------------------------------------------------------|--------------------------------|-----------|------------------|---------------------------------------|----------------------------------------------------------------------------------------------|------------------------------------------------------------|
| <b>Poverty</b>                    | % of the population living below the poverty line, 2019                   | Pre-COVID state characteristic | Normalize | 1/1/20 - 7/31/22 | log(cumulative infections per capita) | education + population over 65 + population under 20 + UI benefit length + UI benefit amount | GBD 2019                                                   |
| <b>Income inequality</b>          | Gini coefficient, 2019                                                    | Pre-COVID state characteristic | Normalize | 1/1/20 - 7/31/22 | log(cumulative infections per capita) | education + population over 65 + population under 20 + UI benefit length + UI benefit amount | US Census Bureau                                           |
| <b>Governor party affiliation</b> | Governor's political party affiliation (Republican/Democrat), 2019        | Pre-COVID state characteristic | None      | 1/1/20 - 7/31/22 | log(cumulative infections per capita) | education + population over 65 + population under 20 + UI benefit length + UI benefit amount | Harvard Dataverse                                          |
| <b>Vote share (2020)</b>          | % of the vote that went for the Republican presidential candidate in 2020 | Pre-COVID state characteristic | Normalize | 1/1/20 - 7/31/22 | log(cumulative infections per capita) | education + population over 65 + population under 20 + UI benefit length + UI benefit amount | Harvard Dataverse                                          |
| <b>Interpersonal trust</b>        | Most people can be trusted                                                | Pre-COVID state characteristic | Normalize | 1/1/20 - 7/31/22 | log(cumulative infections per capita) | education + population over 65 + population under 20 + UI benefit length                     | 2016/2018 Cooperative Congressional Election Survey (CCES) |

|                               |                                                                                 |                                |           |                  |                                       |                                                                                              |                                                            |
|-------------------------------|---------------------------------------------------------------------------------|--------------------------------|-----------|------------------|---------------------------------------|----------------------------------------------------------------------------------------------|------------------------------------------------------------|
|                               |                                                                                 |                                |           |                  |                                       | + UI benefit amount                                                                          |                                                            |
| <b>Trust in science</b>       | A lot or moderate amount of trust in the scientific community                   | Pre-COVID state characteristic | Normalize | 1/1/20 - 7/31/22 | log(cumulative infections per capita) | education + population over 65 + population under 20 + UI benefit length + UI benefit amount | 2018 Cooperative Congressional Election Survey (CCES)      |
| <b>Trust in government</b>    | Always or almost always trust the federal government to do what is right        | Pre-COVID state characteristic | Normalize | 1/1/20 - 7/31/22 | log(cumulative infections per capita) | education + population over 65 + population under 20 + UI benefit length + UI benefit amount | 2016/2018 Cooperative Congressional Election Survey (CCES) |
| <b>Paid family/sick leave</b> | Existence of state-funded paid family or medical leave (Neither/One/Both), 2019 | Pre-COVID state characteristic | None      | 1/1/20 - 7/31/22 | log(cumulative infections per capita) | education + population over 65 + population under 20 + UI benefit length + UI benefit amount | Kaiser Family Foundation                                   |

|                            |                                                                                                                                                                                                                                                  |              |      |                 |                                        |                                                                                                                          |                                                                                                                                                                                                                                                                                                                                                                                                               |
|----------------------------|--------------------------------------------------------------------------------------------------------------------------------------------------------------------------------------------------------------------------------------------------|--------------|------|-----------------|----------------------------------------|--------------------------------------------------------------------------------------------------------------------------|---------------------------------------------------------------------------------------------------------------------------------------------------------------------------------------------------------------------------------------------------------------------------------------------------------------------------------------------------------------------------------------------------------------|
| <b>Mandate propensity</b>  | First principal component of a PCA of the following variables: mask mandates, stay-at-home orders, restaurant closures, bar closures, gathering restrictions, primary school closures, higher education closures, and gym/pool/leisure closures. | COVID policy | None | 4/1/20 - 6/1/21 | mean(log(daily infections per capita)) | population density + comorbidities                                                                                       | <i>Constructed</i>                                                                                                                                                                                                                                                                                                                                                                                            |
| <b>Mask mandates</b>       | % of days during the analysis time period with a mask mandate in effect                                                                                                                                                                          | COVID policy | None | 4/1/20 - 6/1/21 | mean(log(daily infections per capita)) | education + population over 65 + population under 20 + UI benefit length + UI benefit amount + leave-one-out mandate PCA | COVID19StatePolicy.org; Christopher Adolph, Kenya Amano, Bree Bang-Jensen, Nancy Fullman, John Wilkerson. 2021. "Pandemic Politics: Timing State-Level Social Distancing Responses to COVID-19." Journal of Health Politics, Policy and Law; Christopher Adolph, Kenya Amano, Bree Bang-Jensen, Nancy Fullman, Beatrice Magistro, Grace Reinke, Rachel Castellano, Megan Erickson, John Wilkerson. 2021. "The |
| <b>Stay at home orders</b> | % of days during the analysis time period with a stay-at-home order in effect                                                                                                                                                                    | COVID policy | None | 4/1/20 - 6/1/21 | mean(log(daily infections per capita)) | education + population over 65 + population under 20 + UI benefit length + UI benefit amount + leave-one-out mandate PCA | COVID19StatePolicy.org; Christopher Adolph, Kenya Amano, Bree Bang-Jensen, Nancy Fullman, Beatrice Magistro, Grace Reinke, Rachel Castellano, Megan Erickson, John Wilkerson. 2021. "The                                                                                                                                                                                                                      |

|                                |                                                                                                                                                              |              |      |                 |                                        |                                                                                                                          |                                                                                                                                                                         |
|--------------------------------|--------------------------------------------------------------------------------------------------------------------------------------------------------------|--------------|------|-----------------|----------------------------------------|--------------------------------------------------------------------------------------------------------------------------|-------------------------------------------------------------------------------------------------------------------------------------------------------------------------|
| <b>Restaurant closures</b>     | % of days during the analysis time period with restaurants mandated shut                                                                                     | COVID policy | None | 4/1/20 - 6/1/21 | mean(log(daily infections per capita)) | education + population over 65 + population under 20 + UI benefit length + UI benefit amount + leave-one-out mandate PCA | Pandemic Policy U-Turn: Partisanship, Public Health, and Race in Decisions to Ease COVID-19 Social Distancing Policies in the United States." Perspectives on Politics. |
| <b>Bar closures</b>            | % of days during the analysis time period with bars mandated shut                                                                                            | COVID policy | None | 4/1/20 - 6/1/21 | mean(log(daily infections per capita)) | education + population over 65 + population under 20 + UI benefit length + UI benefit amount + leave-one-out mandate PCA |                                                                                                                                                                         |
| <b>Gathering restrictions</b>  | % of days during the analysis time period with restrictions in place for indoor gatherings of 50 people or more and outdoor gatherings of 100 people or more | COVID policy | None | 4/1/20 - 6/1/21 | mean(log(daily infections per capita)) | education + population over 65 + population under 20 + UI benefit length + UI benefit amount + leave-one-out mandate PCA |                                                                                                                                                                         |
| <b>Primary school closures</b> | % of days during the analysis time period with primary schools mandated shut for in-person activities                                                        | COVID policy | None | 4/1/20 - 6/1/21 | mean(log(daily infections per capita)) | education + population over 65 + population under 20 + UI benefit length + UI benefit amount +                           |                                                                                                                                                                         |

|                                                                    |                                                                                                                                    |              |      |                     |                                              |                                                                                                                                                     |                                                                                                                                  |
|--------------------------------------------------------------------|------------------------------------------------------------------------------------------------------------------------------------|--------------|------|---------------------|----------------------------------------------|-----------------------------------------------------------------------------------------------------------------------------------------------------|----------------------------------------------------------------------------------------------------------------------------------|
|                                                                    |                                                                                                                                    |              |      |                     |                                              |                                                                                                                                                     | leave-one-out<br>mandate PCA                                                                                                     |
| <b>Higher education<br/>closures</b>                               | % of days during the<br>analysis time period<br>with higher education<br>institutions mandated<br>shut for in-person<br>activities | COVID policy | None | 4/1/20 -<br>6/1/21  | mean(log(daily<br>infections per<br>capita)) | education +<br>population<br>over 65 +<br>population<br>under 20 + UI<br>benefit length<br>+ UI benefit<br>amount +<br>leave-one-out<br>mandate PCA |                                                                                                                                  |
| <b>Gym/pool/leisure<br/>closures</b>                               | % of days during the<br>analysis time period<br>with gyms, pools, and<br>other leisure<br>destinations mandated<br>shut            | COVID policy | None | 4/1/20 -<br>6/1/21  | mean(log(daily<br>infections per<br>capita)) | education +<br>population<br>over 65 +<br>population<br>under 20 + UI<br>benefit length<br>+ UI benefit<br>amount +<br>leave-one-out<br>mandate PCA |                                                                                                                                  |
| <b>Federal<br/>unemployment<br/>insurance benefit<br/>duration</b> | Average length (in<br>weeks) of<br>unemployment<br>insurance benefit, 2019                                                         | COVID policy | None | 4/1/20 -<br>7/31/22 | mean(log(daily<br>infections per<br>capita)) | education +<br>population<br>over 65 +<br>population<br>under 20 + UI<br>benefit length<br>+ UI benefit<br>amount                                   | US Department of<br>Labor, Center on Budget<br>and Policy Priorities,<br>Missouri Economic<br>Research and<br>Information Center |



|                                                      |                                                                                 |                |      |                    |                                        |                                                                                              |                                                                                                                   |
|------------------------------------------------------|---------------------------------------------------------------------------------|----------------|------|--------------------|----------------------------------------|----------------------------------------------------------------------------------------------|-------------------------------------------------------------------------------------------------------------------|
| <b>Federal unemployment insurance benefit amount</b> | Average price-adjusted unemployment insurance benefit amount (in dollars), 2019 | COVID policy   | None | 4/1/20 - 7/31/22   | mean(log(daily infections per capita)) | education + population over 65 + population under 20 + UI benefit length + UI benefit amount | US Department of Labor, Center on Budget and Policy Priorities, Missouri Economic Research and Information Center |
| <b>Vaccine mandates (school employees)</b>           | History of COVID vaccine mandate for school employees (Yes/No)                  | COVID policy   | None | 3/15/21 - 07/31/22 | log(cumulative infections per capita)  | education + population over 65 + population under 20 + UI benefit length + UI benefit amount | Kaiser Family Foundation                                                                                          |
| <b>Vaccine mandates (state employees)</b>            | History of COVID vaccine mandate for state employees (Yes/No/Partial)           | COVID policy   | None | 3/15/21 - 7/31/22  | log(cumulative infections per capita)  | education + population over 65 + population under 20 + UI benefit length + UI benefit amount | Kaiser Family Foundation                                                                                          |
| <b>Mask use</b>                                      | Average proportion of the population who always wear a mask when leaving home   | COVID behavior | None | 4/1/20 - 7/31/22   | mean(log(daily infections per capita)) | education + population over 65 + population under 20 + UI benefit length + UI benefit amount | IHME COVID-19 database                                                                                            |

|                       |                                                                                                                                                                         |                |                |                    |                                        |                                                                                              |                                                                                                                                                                                                                                    |
|-----------------------|-------------------------------------------------------------------------------------------------------------------------------------------------------------------------|----------------|----------------|--------------------|----------------------------------------|----------------------------------------------------------------------------------------------|------------------------------------------------------------------------------------------------------------------------------------------------------------------------------------------------------------------------------------|
| <b>Mobility</b>       | Average daily relative change in mobility from pre-pandemic baseline                                                                                                    | COVID behavior | None           | 4/1/20 - 7/31/22   | mean(log(daily infections per capita)) | education + population over 65 + population under 20 + UI benefit length + UI benefit amount | Google Global COVID-19 Community Mobility Report; Apple Inc. COVID-19 Mobility Trends Report; United States Mobility Changes in Response to COVID-19 2020 - Descarte Labs; United States SafeGraph Social Distancing Metrics 2020. |
| <b>Vaccine uptake</b> | Fully vaccinated person-days per total person-days, where fully vaccinated is defined as receiving 2 doses of a two-dose regimen or a single dose of a one-dose regimen | COVID behavior | None           | 3/15/21 - 07/31/22 | mean(log(daily infections per capita)) | education + population over 65 + population under 20 + UI benefit length + UI benefit amount | IHME COVID-19 database                                                                                                                                                                                                             |
| <b>Infections</b>     | Cumulative infections per capita                                                                                                                                        | COVID outcomes | Log, Normalize | 4/1/20 - 12/15/21  | mean(log(daily infections per capita)) | education + population over 65 + population under 20 + UI benefit length + UI benefit amount | IHME COVID-19 database                                                                                                                                                                                                             |
| <b>Deaths</b>         | Cumulative deaths per capita                                                                                                                                            | COVID outcomes | Log, Normalize | 4/1/20 - 07/31/22  | mean(log(daily infections per capita)) | education + population over 65 + population under 20 + UI benefit length                     | IHME COVID-19 database                                                                                                                                                                                                             |

|                         |                                          |                |           |                   |                                        |                                                                                              |                        |
|-------------------------|------------------------------------------|----------------|-----------|-------------------|----------------------------------------|----------------------------------------------------------------------------------------------|------------------------|
|                         |                                          |                |           |                   |                                        | + UI benefit amount                                                                          |                        |
| <b>IFR</b>              | Age-standardised Infection-fatality rate | COVID outcomes | Normalize | 4/1/20 - 12/15/21 | mean(log(daily infections per capita)) | education + population over 65 + population under 20 + UI benefit length + UI benefit amount | IHME COVID-19 database |
| <b>Hospitalisations</b> | Cumulative hospitalisations per capita   | COVID outcomes | Normalize | 4/1/20 - 12/15/21 | mean(log(daily infections per capita)) | education + population over 65 + population under 20 + UI benefit length + UI benefit amount | IHME COVID-19 database |

### 3.5 Education model inputs

*Description of all dependent and independent variables explored in the education regression analysis, including mathematical transformations, relevant time period, control variables, and data sources.*

| <b>Variable name</b>              | <b>Definition</b>                                                                  | <b>Category</b>                | <b>Transformation</b> | <b>Analysis Time Period</b> | <b>Dependent variable transformation</b> | <b>Controls</b> | <b>Source</b>                                              |
|-----------------------------------|------------------------------------------------------------------------------------|--------------------------------|-----------------------|-----------------------------|------------------------------------------|-----------------|------------------------------------------------------------|
| <b>Education</b>                  | Change in mean test score from 2019 to 2022 for 4th and 8th grade math and reading | Dependent variable             | None                  | NA                          | NA                                       | NA              | National Center for Education Statistics                   |
| <b>Poverty</b>                    | % of the population living below the poverty line, 2019                            | Pre-COVID state characteristic | Normalize             | 1/1/20 - 2/15/22            | log(cumulative infections per capita)    | NA              | GBD 2019                                                   |
| <b>Income inequality</b>          | Gini coefficient, 2019                                                             | Pre-COVID state characteristic | Normalize             | 1/1/20 - 2/15/22            | log(cumulative infections per capita)    | NA              | US Census Bureau                                           |
| <b>Governor party affiliation</b> | Governor's political party affiliation (Republican/Democrat), 2019                 | Pre-COVID state characteristic | None                  | 1/1/20 - 2/15/22            | log(cumulative infections per capita)    | NA              | Harvard Dataverse                                          |
| <b>Vote share (2020)</b>          | % of the vote that went for the Republican presidential candidate in 2020          | Pre-COVID state characteristic | Normalize             | 1/1/20 - 2/15/22            | log(cumulative infections per capita)    | NA              | Harvard Dataverse                                          |
| <b>Interpersonal trust</b>        | Most people can be trusted                                                         | Pre-COVID state characteristic | Normalize             | 1/1/20 - 2/15/22            | log(cumulative infections per capita)    | NA              | 2016/2018 Cooperative Congressional Election Survey (CCES) |
| <b>Trust in science</b>           | A lot or moderate amount of trust in the scientific community                      | Pre-COVID state characteristic | Normalize             | 1/1/20 - 2/15/22            | log(cumulative infections per capita)    | NA              | 2018 Cooperative Congressional Election Survey (CCES)      |

|                               |                                                                                                                                                                                                                                                  |                                |           |                  |                                        |                                    |                                                                                                                                                                                                                                                                                                                         |
|-------------------------------|--------------------------------------------------------------------------------------------------------------------------------------------------------------------------------------------------------------------------------------------------|--------------------------------|-----------|------------------|----------------------------------------|------------------------------------|-------------------------------------------------------------------------------------------------------------------------------------------------------------------------------------------------------------------------------------------------------------------------------------------------------------------------|
| <b>Trust in government</b>    | Always or almost always trust the federal government to do what is right                                                                                                                                                                         | Pre-COVID state characteristic | Normalize | 1/1/20 - 2/15/22 | log(cumulative infections per capita)  | NA                                 | 2016/2018 Cooperative Congressional Election Survey (CCES)                                                                                                                                                                                                                                                              |
| <b>Mandate propensity</b>     | First principal component of a PCA of the following variables: mask mandates, stay-at-home orders, restaurant closures, bar closures, gathering restrictions, primary school closures, higher education closures, and gym/pool/leisure closures. | COVID policy                   | None      | 4/1/20 - 6/1/21  | mean(log(daily infections per capita)) | population density + comorbidities | <i>Constructed</i>                                                                                                                                                                                                                                                                                                      |
| <b>Mask mandates</b>          | % of days during the analysis time period with a mask mandate in effect                                                                                                                                                                          | COVID policy                   | None      | 4/1/20 - 2/15/22 | mean(log(daily infections per capita)) | leave-one-out mandate PCA          | COVID19StatePolicy.org; Christopher Adolph, Kenya Amano, Bree Bang-Jensen, Nancy Fullman, John Wilkerson. 2021. "Pandemic Politics: Timing State-Level Social Distancing Responses to COVID-19." Journal of Health Politics, Policy and Law; Christopher Adolph, Kenya Amano, Bree Bang-Jensen, Nancy Fullman, Beatrice |
| <b>Stay at home orders</b>    | % of days during the analysis time period with a stay-at-home order in effect                                                                                                                                                                    | COVID policy                   | None      | 4/1/20 - 2/15/22 | mean(log(daily infections per capita)) | leave-one-out mandate PCA          |                                                                                                                                                                                                                                                                                                                         |
| <b>Gathering restrictions</b> | % of days during the analysis time period with restrictions in place for indoor gatherings of 50 people or more and outdoor gatherings of 100 people or more                                                                                     | COVID policy                   | None      | 4/1/20 - 2/15/22 | mean(log(daily infections per capita)) | leave-one-out mandate PCA          |                                                                                                                                                                                                                                                                                                                         |

|                                            |                                                                                                                                                                                                                                                  |              |      |                  |                                        |                                    |                                                                                                                                                                                                                                                               |
|--------------------------------------------|--------------------------------------------------------------------------------------------------------------------------------------------------------------------------------------------------------------------------------------------------|--------------|------|------------------|----------------------------------------|------------------------------------|---------------------------------------------------------------------------------------------------------------------------------------------------------------------------------------------------------------------------------------------------------------|
| <b>Primary school closures</b>             | % of days during the analysis time period with primary schools mandated shut for in-person activities                                                                                                                                            | COVID policy | None | 4/1/20 - 2/15/22 | mean(log(daily infections per capita)) | leave-one-out mandate PCA          | Magistro, Grace Reinke, Rachel Castellano, Megan Erickson, John Wilkerson. 2021. "The Pandemic Policy U-Turn: Partisanship, Public Health, and Race in Decisions to Ease COVID-19 Social Distancing Policies in the United States." Perspectives on Politics. |
| <b>Higher education closures</b>           | % of days during the analysis time period with higher education institutions mandated shut for in-person activities                                                                                                                              | COVID policy | None | 4/1/20 - 2/15/22 | mean(log(daily infections per capita)) | leave-one-out mandate PCA          |                                                                                                                                                                                                                                                               |
| <b>Vaccine mandates (school employees)</b> | History of COVID vaccine mandate for school employees (Yes/No)                                                                                                                                                                                   | COVID policy | None | 1/1/20 - 2/15/22 | log(cumulative infections per capita)  | leave-one-out mandate PCA          | Kaiser Family Foundation                                                                                                                                                                                                                                      |
| <b>Vaccine mandates (state employees)</b>  | History of COVID vaccine mandate for state employees (Yes/No/Partial)                                                                                                                                                                            | COVID policy | None | 1/1/20 - 2/15/22 | log(cumulative infections per capita)  | leave-one-out mandate PCA          | Kaiser Family Foundation                                                                                                                                                                                                                                      |
| <b>Mandate propensity</b>                  | First principal component of a PCA of the following variables: mask mandates, stay-at-home orders, restaurant closures, bar closures, gathering restrictions, primary school closures, higher education closures, and gym/pool/leisure closures. | COVID policy | None | 4/1/20 - 6/1/21  | mean(log(daily infections per capita)) | population density + comorbidities | <i>Constructed</i>                                                                                                                                                                                                                                            |

|                       |                                                                                                                                                                         |                |                |                  |                                        |    |                                                                                                                                                                                                                                     |
|-----------------------|-------------------------------------------------------------------------------------------------------------------------------------------------------------------------|----------------|----------------|------------------|----------------------------------------|----|-------------------------------------------------------------------------------------------------------------------------------------------------------------------------------------------------------------------------------------|
| <b>Mask use</b>       | Average proportion of the population who always wear a mask when leaving home                                                                                           | COVID behavior | None           | 4/1/20 - 2/15/22 | mean(log(daily infections per capita)) | NA | IHME COVID-19 database                                                                                                                                                                                                              |
| <b>Mobility</b>       | Average daily relative change in mobility from pre-pandemic baseline                                                                                                    | COVID behavior | None           | 4/1/20 - 2/15/22 | mean(log(daily infections per capita)) | NA | Google Global COVID-19 Community Mobility Report; Apple Inc. COVID-19 Mobility Trends Report; United States Mobility Changes in Response to COVID-19 2020 - Descartes Labs; United States SafeGraph Social Distancing Metrics 2020. |
| <b>Vaccine uptake</b> | Fully vaccinated person-days per total person-days, where fully vaccinated is defined as receiving 2 doses of a two-dose regimen or a single dose of a one-dose regimen | COVID behavior | None           | 4/1/20 - 2/15/22 | mean(log(daily infections per capita)) | NA | IHME COVID-19 database                                                                                                                                                                                                              |
| <b>Infections</b>     | Cumulative infections per capita                                                                                                                                        | COVID outcomes | Log, Normalize | 4/1/20 - 2/15/22 | mean(log(daily infections per capita)) | NA | IHME COVID-19 database                                                                                                                                                                                                              |
| <b>Deaths</b>         | Cumulative deaths per capita                                                                                                                                            | COVID outcomes | Log, Normalize | 4/1/20 - 2/15/22 | mean(log(daily infections per capita)) | NA | IHME COVID-19 database                                                                                                                                                                                                              |
| <b>IFR</b>            | Age-standardised Infection-fatality rate                                                                                                                                | COVID outcomes | Normalize      | 4/1/20 - 2/15/22 | mean(log(daily infections per capita)) | NA | IHME COVID-19 database                                                                                                                                                                                                              |

|                         |                                        |                |           |                  |                                        |    |                        |
|-------------------------|----------------------------------------|----------------|-----------|------------------|----------------------------------------|----|------------------------|
| <b>Hospitalisations</b> | Cumulative hospitalisations per capita | COVID outcomes | Normalize | 4/1/20 - 2/15/22 | mean(log(daily infections per capita)) | NA | IHME COVID-19 database |
|-------------------------|----------------------------------------|----------------|-----------|------------------|----------------------------------------|----|------------------------|



### 3.6 Dependent variables by state

*Standardised cumulative infection and death rates, relative reduction in cumulative GDP and employment, and change in fourth-grade math and reading test scores for 50 US states and Washington DC*

| State                | Standardized cumulative infection rate, per 10,000 (Jan 1, 2020 – Dec 15, 2021) | Standardized cumulative death rate, per 100,000 (Jan 1, 2020 – July 31, 2022) | Cumulative GDP relative to expected cumulative GDP (Jan 1, 2020 – July 31, 2022) | Cumulative employment relative to expected cumulative employment (Jan 1, 2020 – July 31, 2022) | Change in 4th grade reading scores (Fall 2019 to fall 2022) | Change in 4th grade math scores (Fall 2019 to fall 2022) |
|----------------------|---------------------------------------------------------------------------------|-------------------------------------------------------------------------------|----------------------------------------------------------------------------------|------------------------------------------------------------------------------------------------|-------------------------------------------------------------|----------------------------------------------------------|
| Alabama              | 5554                                                                            | 429                                                                           | 0.99                                                                             | 0.97                                                                                           | 1.57                                                        | 0.39                                                     |
| Alaska               | 4668                                                                            | 443                                                                           | 0.94                                                                             | 0.94                                                                                           | -0.54                                                       | -6.39                                                    |
| Arizona              | 4342                                                                            | 581                                                                           | 0.99                                                                             | 0.99                                                                                           | -0.36                                                       | -5.63                                                    |
| Arkansas             | 4918                                                                            | 400                                                                           | 1.01                                                                             | 0.99                                                                                           | -3.10                                                       | -5.11                                                    |
| California           | 3179                                                                            | 418                                                                           | 0.95                                                                             | 0.95                                                                                           | -2.09                                                       | -4.36                                                    |
| Colorado             | 4841                                                                            | 473                                                                           | 0.95                                                                             | 0.97                                                                                           | -2.01                                                       | -5.70                                                    |
| Connecticut          | 3662                                                                            | 293                                                                           | 0.96                                                                             | 0.95                                                                                           | -5.20                                                       | -6.90                                                    |
| Delaware             | 3979                                                                            | 311                                                                           | 0.93                                                                             | 0.96                                                                                           | -9.39                                                       | -13.74                                                   |
| District of Columbia | 3869                                                                            | 526                                                                           | 0.97                                                                             | 0.91                                                                                           | -7.53                                                       | -11.99                                                   |
| Florida              | 5757                                                                            | 313                                                                           | 1.00                                                                             | 0.98                                                                                           | 0.03                                                        | -5.13                                                    |
| Georgia              | 5453                                                                            | 447                                                                           | 0.96                                                                             | 0.98                                                                                           | -2.10                                                       | -2.74                                                    |
| Hawaii               | 1525                                                                            | 147                                                                           | 0.91                                                                             | 0.89                                                                                           | 1.29                                                        | -2.07                                                    |
| Idaho                | 6246                                                                            | 469                                                                           | 1.00                                                                             | 1.02                                                                                           | -7.62                                                       | -5.70                                                    |
| Illinois             | 5748                                                                            | 342                                                                           | 0.98                                                                             | 0.95                                                                                           | -0.39                                                       | -0.32                                                    |
| Indiana              | 4278                                                                            | 332                                                                           | 0.98                                                                             | 0.97                                                                                           | -4.45                                                       | -5.73                                                    |
| Iowa                 | 5939                                                                            | 344                                                                           | 0.95                                                                             | 0.96                                                                                           | -2.48                                                       | -0.86                                                    |
| Kansas               | 4616                                                                            | 371                                                                           | 0.98                                                                             | 0.96                                                                                           | -4.45                                                       | -4.41                                                    |

|                |      |     |      |      |       |       |
|----------------|------|-----|------|------|-------|-------|
| Kentucky       | 5685 | 341 | 0.96 | 0.97 | -4.33 | -5.51 |
| Louisiana      | 4785 | 385 | 0.93 | 0.94 | 2.47  | -2.73 |
| Maine          | 2914 | 218 | 1.00 | 0.96 | -8.43 | -7.69 |
| Maryland       | 4224 | 285 | 0.96 | 0.95 | -7.36 | -9.97 |
| Massachusetts  | 3707 | 355 | 0.98 | 0.94 | -4.29 | -5.59 |
| Michigan       | 5395 | 326 | 1.00 | 0.94 | -6.43 | -3.95 |
| Minnesota      | 4826 | 342 | 0.96 | 0.94 | -6.92 | -9.40 |
| Mississippi    | 5425 | 488 | 0.99 | 0.98 | -2.18 | -7.15 |
| Missouri       | 5227 | 342 | 0.97 | 0.97 | -4.64 | -6.03 |
| Montana        | 5215 | 420 | 1.02 | 1.00 | -2.95 | -2.59 |
| Nebraska       | 5883 | 298 | 0.97 | 0.97 | -3.75 | -2.21 |
| Nevada         | 5082 | 453 | 0.93 | 0.96 | -6.09 | -6.28 |
| New Hampshire  | 3453 | 215 | 1.05 | 0.96 | -1.72 | -5.17 |
| New Jersey     | 4893 | 370 | 0.96 | 0.95 | -4.46 | -6.70 |
| New Mexico     | 5014 | 521 | 0.91 | 0.95 | -5.48 | -9.86 |
| New York       | 4916 | 325 | 0.96 | 0.92 | -6.03 | -9.64 |
| North Carolina | 5070 | 348 | 0.99 | 0.99 | -5.15 | -5.45 |
| North Dakota   | 4626 | 328 | 0.94 | 0.95 | -3.65 | -2.85 |
| Ohio           | 6472 | 293 | 0.97 | 0.95 | -3.41 | -3.38 |
| Oklahoma       | 5041 | 412 | 0.92 | 0.96 | -8.24 | -7.71 |
| Oregon         | 2878 | 330 | 0.97 | 0.95 | -7.41 | -8.16 |
| Pennsylvania   | 5057 | 297 | 0.95 | 0.94 | -4.32 | -6.40 |
| Rhode Island   | 3666 | 321 | 1.00 | 0.95 | -2.93 | -5.21 |
| South Carolina | 5060 | 415 | 0.96 | 0.97 | 0.41  | -2.53 |

|               |      |     |      |      |       |        |
|---------------|------|-----|------|------|-------|--------|
| South Dakota  | 5542 | 354 | 1.04 | 0.99 | -3.93 | -2.29  |
| Tennessee     | 5634 | 421 | 1.01 | 0.99 | -5.06 | -3.35  |
| Texas         | 5718 | 429 | 0.94 | 0.98 | -1.84 | -5.04  |
| Utah          | 5385 | 467 | 1.00 | 1.01 | -4.06 | -4.18  |
| Vermont       | 1723 | 249 | 1.00 | 0.93 | -4.85 | -4.61  |
| Virginia      | 2964 | 336 | 0.98 | 0.96 | -9.60 | -10.53 |
| Washington    | 3753 | 286 | 0.99 | 0.96 | -3.00 | -4.58  |
| West Virginia | 4003 | 322 | 0.96 | 0.96 | -7.87 | -5.53  |
| Wisconsin     | 5911 | 341 | 0.97 | 0.96 | -2.33 | -1.41  |
| Wyoming       | 6144 | 422 | 0.91 | 0.97 | -1.90 | -2.69  |

A summary table of key outcomes. Cumulative infection rates (January 1, 2020 – December 15, 2021) were standardised for population density. Cumulative death rates (January 1, 2020 – July 31, 2022) were standardised for age and presence of comorbidities. Cumulative GDP and employment (January 1, 2020 – July 31, 2022) were measured relative to their expected values, based on pre-COVID-19 trends and were standardised to ensure each economic sector (i.e., tourism, agriculture, etc.) were equally represented in each state. Fourth-grade math and science test scores were measured in the fall of 2019 and fall of 2022, with the change over time reported.

### 3.7 Correlation among independent variables

Pearson correlation coefficients for key independent and control variables

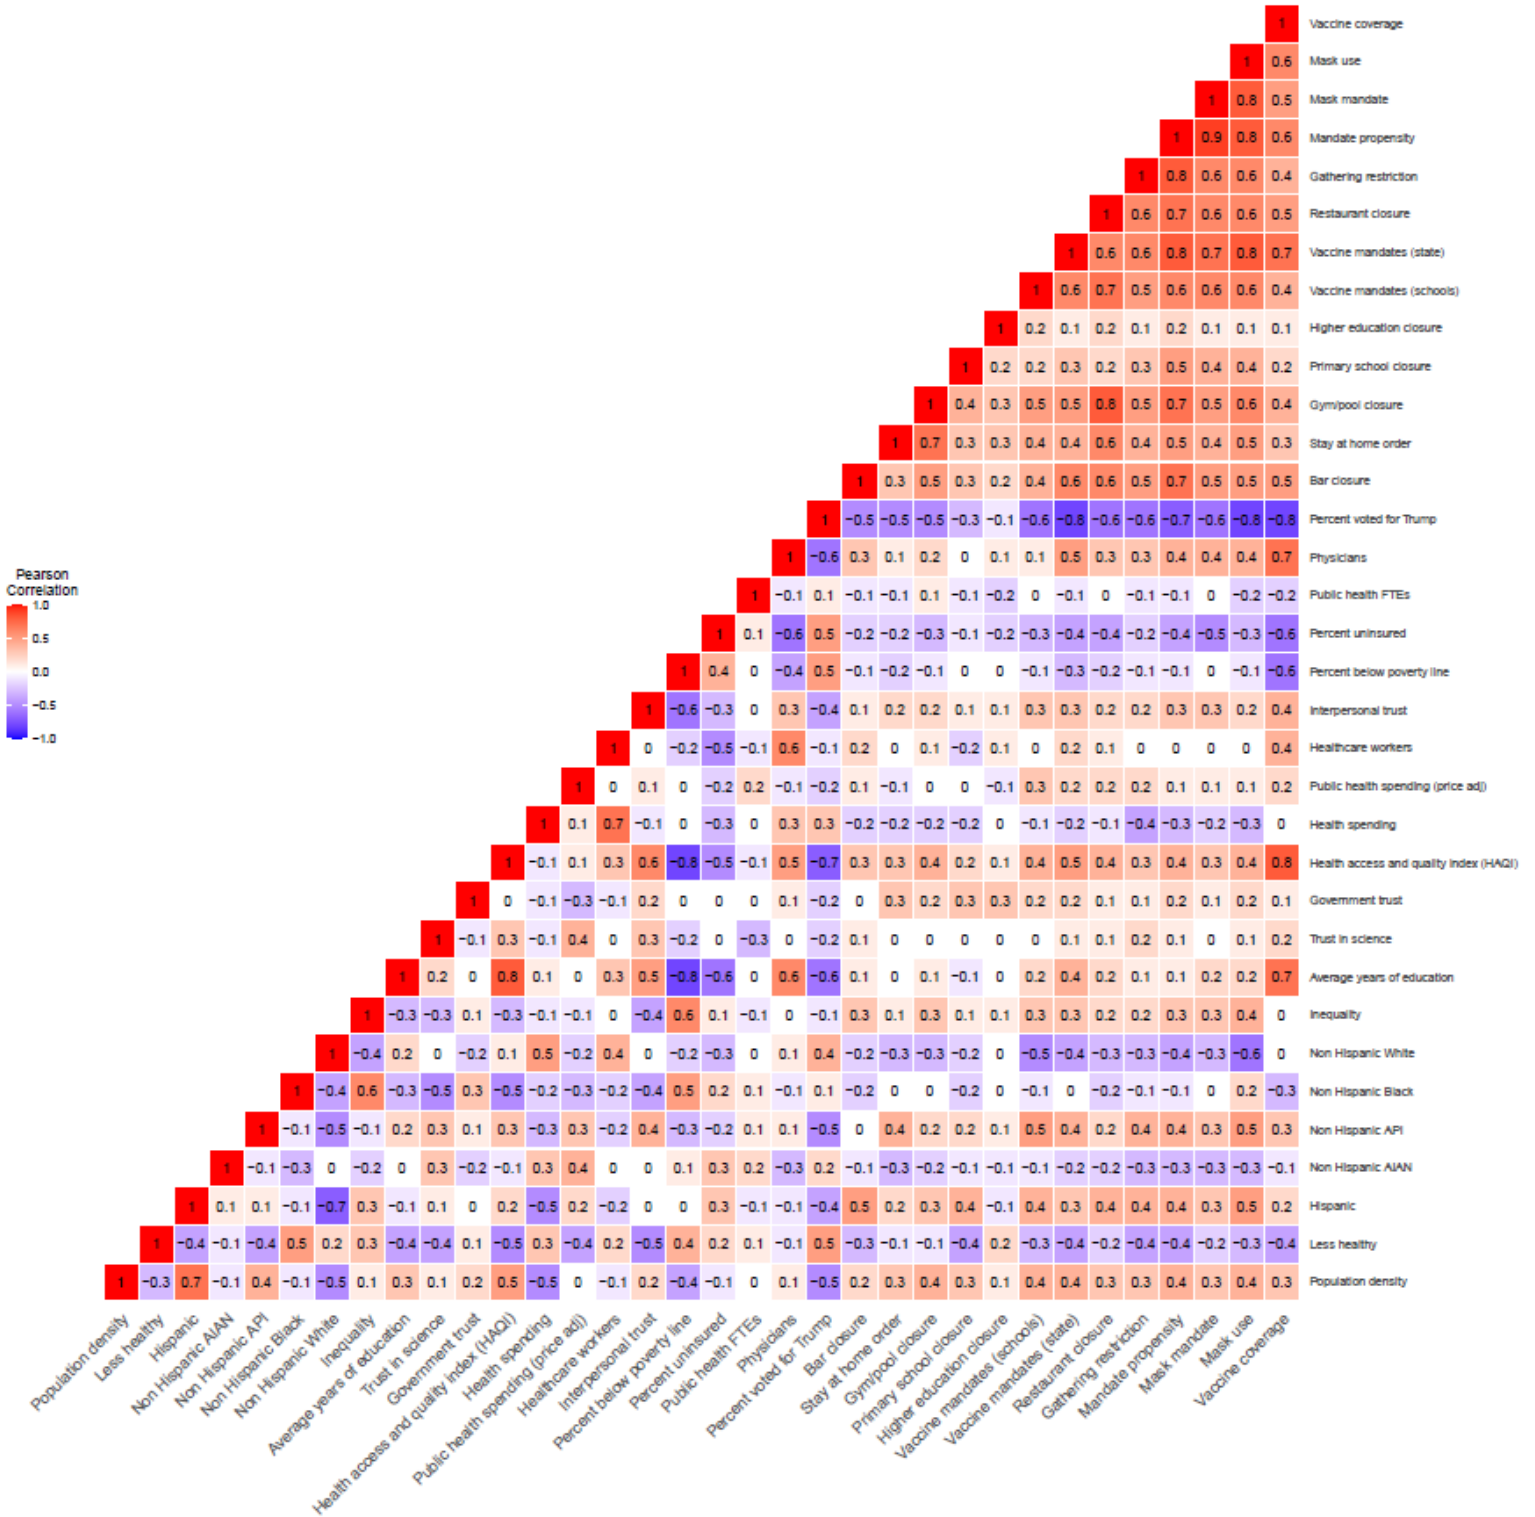

### 3.8 Reduction in economic indicators and education scores by state

*Reductions in standardised GDP, standardised employment, and fourth-grade math and reading scores by state, January 1, 2020 to July 31, 2022*

**A. Adjusted GDP**

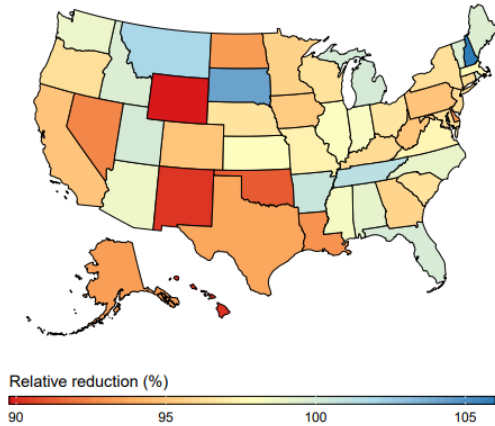

**B. Adjusted Employment**

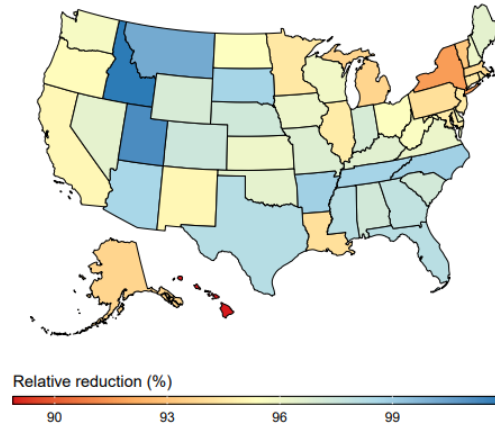

**C. Math, grade 4**

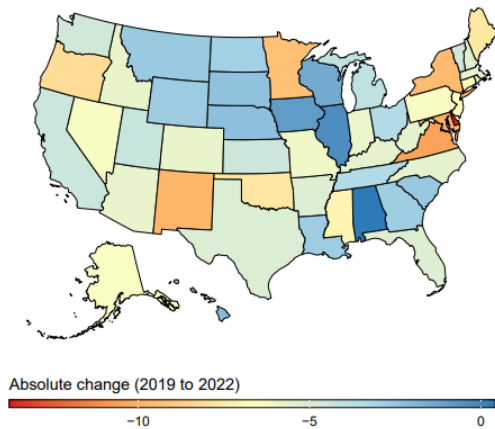

**D. Reading, grade 4**

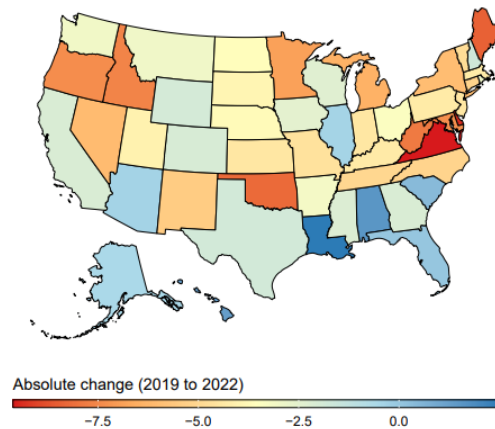

Each panel shows the reduction in economic indicators or education scores during the pandemic. Panel A shows the relative reduction of state GDP after the GDP has been standardised to address states' reliance on different economic sectors, such as tourism and agriculture. The reported relative reduction is the value of cumulative reduction in economic production (GDP) relative to the expected economic production based on projections from changes in standardised GDP in 2019. Panel B shows the relative reduction of state employment count after the employment rate has been standardised to address states' reliance on different economic sectors. The reported relative reduction is the value of cumulative reduction in person-days employed relative to the expected person-days employed had the employment rates stayed constant at the 2019 rate during the pandemic. Panel C shows the absolute reduction in the mean fourth-grade math score between fall of 2019 and fall of 2022. Panel D shows the absolute reduction in the mean fourth-grade reading score between fall of 2019 and fall of 2022. This figure describes changes and does not identify key association between these variables.

### 3.9 Syndemic framework for COVID-19

*Syndemic framework for COVID-19: interaction of race, politics, poverty, education, trust, and access to health-care*

**Panel A. Low performers**

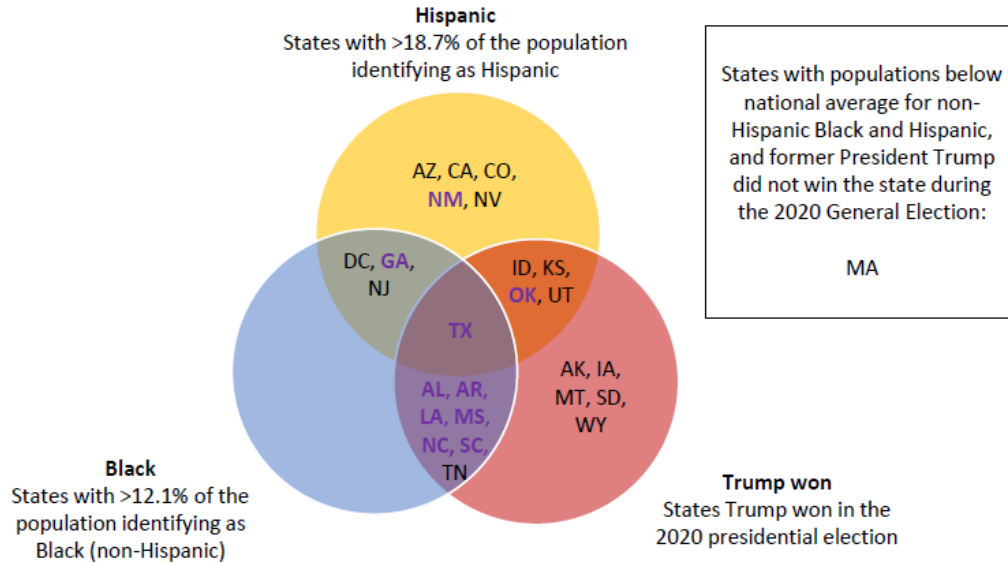

**Panel B. High performers**

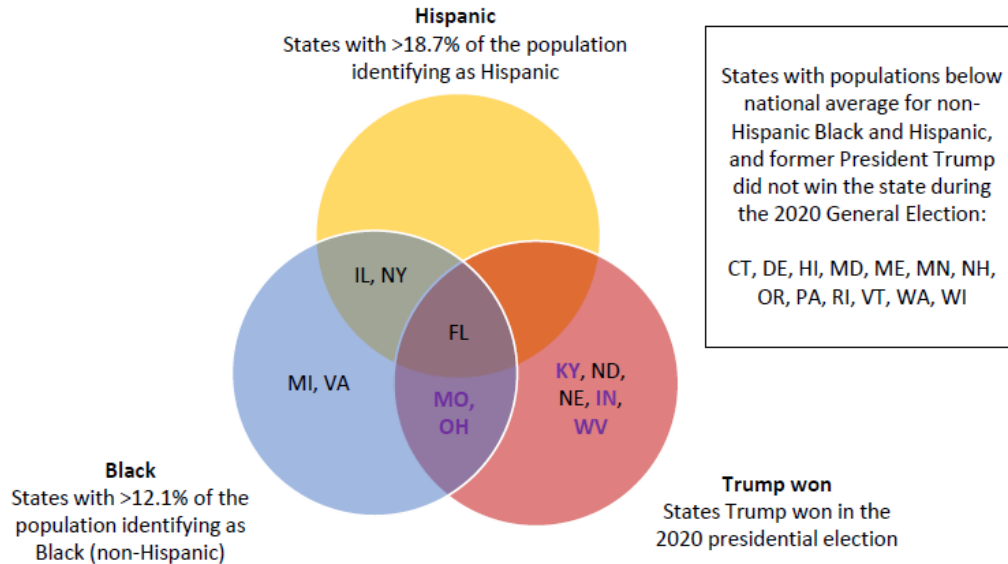

Panel A shows the 25 states, plus the District of Columbia, with the highest standardized cumulative COVID-19 death rate, categorized according to the following criteria: (1) states with populations exceeding the national value (18.7%) for percent of individuals identifying as Hispanic (2) states with populations exceeding the national value (12.1%) for percent of individuals identifying as Black (non-Hispanic) and (3) states where former President Trump won during the 2020 general election. Data on

race and ethnicity were sourced from the 2020 US Census. States that are shown in bold purple text exhibit high poverty rates, low education, low levels of interpersonal trust, and low access to quality healthcare, defined as being in the bottom 50<sup>th</sup> percentile of states across all four metrics. Panel B shows the same information for the 25 states with the lowest standardized cumulative COVID-19 death rate.

### 3.10 Mandate propensity

Mandate propensity is a summary measure describing a state’s usage of physical distancing and mask mandates. It is calculated as the first component of a PCA of the following mandates: bar closures, restaurant closures, gathering restrictions, primary school closures, higher education closures, gym closures, mask mandates, and stay at home orders. Each mandate was expressed as the proportion of days that the mandate was in effect during the analysis period.

#### *Mandate propensity score by state*

| State                | Mandate Propensity |
|----------------------|--------------------|
| Alabama              | 0.33               |
| Alaska               | 0.16               |
| Arizona              | 0.70               |
| Arkansas             | 0.39               |
| California           | 0.95               |
| Colorado             | 0.65               |
| Connecticut          | 0.73               |
| Delaware             | 0.55               |
| District of Columbia | 1.04               |
| Florida              | 0.22               |
| Georgia              | 0.29               |
| Hawaii               | 0.83               |
| Idaho                | 0.27               |
| Illinois             | 0.81               |
| Indiana              | 0.41               |
| Iowa                 | 0.24               |
| Kansas               | 0.24               |
| Kentucky             | 0.54               |
| Louisiana            | 0.48               |
| Maine                | 0.71               |
| Maryland             | 0.48               |
| Massachusetts        | 0.75               |
| Michigan             | 0.73               |
| Minnesota            | 0.61               |
| Mississippi          | 0.39               |
| Missouri             | 0.15               |

| State          | Mandate Propensity |
|----------------|--------------------|
| Montana        | 0.28               |
| Nebraska       | 0.20               |
| Nevada         | 0.75               |
| New Hampshire  | 0.41               |
| New Jersey     | 0.52               |
| New Mexico     | 0.86               |
| New York       | 0.63               |
| North Carolina | 0.67               |
| North Dakota   | 0.11               |
| Ohio           | 0.51               |
| Oklahoma       | 0.08               |
| Oregon         | 0.83               |
| Pennsylvania   | 0.57               |
| Rhode Island   | 0.62               |
| South Carolina | 0.29               |
| South Dakota   | 0.10               |
| Tennessee      | 0.25               |
| Texas          | 0.47               |
| Utah           | 0.35               |
| Vermont        | 0.50               |
| Virginia       | 0.52               |
| Washington     | 1.01               |
| West Virginia  | 0.51               |
| Wisconsin      | 0.28               |
| Wyoming        | 0.38               |



## Section 4: Methods

### 4.1 Modeling COVID-19 Deaths

Daily estimates of COVID-19 deaths by state from January 1, 2020 through July 31, 2022 were retrieved from IHME's COVID-19 database. These estimates were based on death reporting data from Johns Hopkins University and have been adjusted to correct for missingness and reporting lags. Mortality rates were then adjusted to account for under-reporting by applying a scaling factor based on estimated all-cause excess mortality, reported COVID-19 deaths, and estimated COVID-19 mortality assuming the maximum observed infection-detection ratio (IDR). The resulting estimates reflect all COVID-19 mortality, both reported and unreported.

To account for differences in age patterns across states, we indirectly age-standardized the death rate to the national age pattern. Estimated age-specific death proportions were based on age-specific mortality data as published by the National Center for Health Statistics (NCHS). These proportions were applied to the IHME's all-age mortality estimates to generate estimates of the age-specific death counts required to age-standardize.

We fit a series of log-linear models, regressing the logged age-standardized cumulative mortality rate during the period January 1, 2020 to July 31, 2022 on state-level factors of interest. These factors comprised 3 broad categories: pre-pandemic state characteristics, policies adopted by states during the pandemic, and population-level behavioral responses to the pandemic. Section 3.1 of this appendix describes all factors investigated in the mortality analysis, their data source, and important features of the model.

All mortality models controlled for age and the prevalence of comorbid conditions. Age was accounted for by age-standardizing the mortality rate, as described above. To adjust for comorbidities, we performed a principal component analysis (PCA) to create a summary metric of seven health conditions and risk behaviors that increase the risk of COVID-19. These conditions were age-standardized prevalence of asthma, cancer, chronic obstructive pulmonary disease (COPD), cardiovascular disease, and diabetes, along with body-mass index (BMI) and smoking rate. We included the first principal component of this PCA as a covariate in all mortality models.

Additionally, all models where the factor of interest was a COVID-19 mandate (such as school closures or stay at home orders) included a covariate to control for all other COVID-19 mandates. We used PCA to create a summary metric of all mandates besides the factor of interest and included the first principal component of this "leave-one-out" mandate PCA as a covariate in the regression.

For factors without daily data (all pre-COVID-19 policies, plus vaccine mandates), we defined the dependent variable as the logged cumulative infection rate. For factors with daily data, we defined the dependent variable as the mean of the logged daily infection rate. We specified a start date of April 1, 2020 for these models to avoid undefined values when taking the log of a 0 infection rate. The advantages to using the mean of the logged daily mortality rate instead of the logged cumulative mortality rate are described in Section 4.1.1 of this appendix.

To capture uncertainty associated with model inputs, we fit 100 independent models for each factor of interest, using the 100 estimates of mortality produced by IHME for each location-day. To capture parameter uncertainty, we generated 100 estimates of the beta coefficient by sampling from a multivariate normal distribution where the mean was defined by the point estimates for fitted betas and

the variance was defined by the variance-covariance matrix. Since each of the 100 draws of mortality generated 100 draws of the beta coefficients, we generated 10,000 estimates per factor to describe the relationship with mortality. We summarized these draws by reporting the mean value along with the 95% uncertainty interval (UI), which is constructed from the 2.5<sup>th</sup> and 97.5<sup>th</sup> percentile of the 10,000 estimates.

#### 4.1.1 Dependent variable specification

Because of policy endogeneity, regressing the log of the cumulative death rate on daily mandate data results in biased estimates of the association between mandates and deaths. Instead, specifying the dependent variable as the mean of the logged daily death rate minimizes bias and reduces the risk of overestimating the mandate effect on mortality. COVID-19 behaviors (mask use, mobility, vaccine coverage) are also vulnerable to this endogeneity problem. Therefore, we used the mean of the logged daily rate as the dependent variable specification when examining the relationship between deaths and mandates, and between deaths and behaviors. For the same reasons, we used this approach for infections as well.

| <b>Notation</b>   | <b>Definition</b>                                                 |
|-------------------|-------------------------------------------------------------------|
| $f(i, t)$         | Counterfactual infections at time $t$ for location $i$            |
| $\tilde{f}(i, t)$ | Observed infections at time $t$ for location $i$                  |
| $m(i, t)$         | Fraction of mandates that are active at time $t$ for location $i$ |
| $\alpha$          | Effect of mandate intensity on infections                         |
| $T$               | Number of days in dataset                                         |
| $y_i$             | Average of log infections across time in location $i$             |
| $m_i$             | Average of mandate intensity across time in location $i$          |

**Model derivation:** Using the above notation, we consider the following model that relates mandates and counterfactual infections (absence of mandates) to observed infections:

$$\tilde{f}(i, t) = \exp(\log(\alpha)m(i, t))f(i, t)$$

When  $m(i, t) = 0$ , the counterfactual infections match the observed, while for  $m(i, t) = 1$ , we have

$$\tilde{f}(i, t) = \alpha f(i, t)$$

Taking the logarithm of the observation model, we obtain

$$\log(\tilde{f}(i, t)) = \alpha m(i, t) + \log(f(i, t))$$

Adding across the time interval and dividing by total time, we obtain the model

$$y_i = \alpha m_i + \frac{1}{T} \sum_t \log(f(i, t))$$

where  $y_i$  is the average of log observed infections in location  $i$ ,  $m_i$  is the average mandate intensity in location  $i$ , while the term  $\frac{1}{T} \sum_t \log (f(i, t))$  is unobserved.

**Regression approach:** To approximate the ideal model, we consider the regression

$$y_i = \beta_0 + \beta_1 m_i + \sum_j \beta_j Cov_j$$

Here,  $\beta_0$  captures the intercept,  $\beta_1$  reflects the action of the average mandate with

$$\beta_1 \approx \log \alpha$$

and additional covariates  $Cov_j$  capture important features that are different between locations.

## 4.2 Modeling COVID-19 Infections

Daily estimates of COVID-19 infections by state from January 1, 2020 through July 31, 2022 were retrieved from IHME’s COVID-19 database. These estimates were based on case reporting data from JHU. Estimated infection counts were intended to reflect all infections, including asymptomatic infections and infections not confirmed by a test. To capture uncertainty, IHME generated 100 estimates of infections for each location-day. This underlying data uncertainty was propagated throughout the analysis as described in this section.

We fit a series of log-linear models, regressing the logged cumulative infection rate during the period January 1, 2020 to December 15, 2021 on state-level factors of interest. As with the mortality regression analysis, the infection analysis investigated factors falling into three broad categories: pre-pandemic state characteristics, COVID-19 policies, and COVID-19 behaviors. Section 3.2 of this appendix describes all factors investigated in the infections analysis, their data source, and important features of the model.

For analysis of COVID-19 infections, we selected an end date of December 2021 to deliberately exclude the Omicron wave. Omicron’s transmissibility and immune escape produced an explosion of infections across the entire United States, making it more difficult to discern which factors were associated with diminished infection rates. As a sensitivity analysis, we conducted our analysis of infections for alternative time periods (Supplementary Appendix: Section 5), including the Omicron period (defined as December 15, 2021 to July 31, 2022).

All infection models controlled for population density because it has a direct impact on transmission yet cannot readily be addressed by policy action. All models where the factor of interest was a COVID-19 mandate included an additional covariate to control for all other COVID-19 mandates. We used PCA to create a summary metric of all mandates besides the factor of interest and included the first principal component of this “leave-one-out” mandate PCA as a covariate in the regression.

For factors without daily data (all pre-COVID-19 policies, plus vaccine mandates), we defined the dependent variable as the logged cumulative infection rate. For factors with daily data, we defined the

dependent variable as the mean of the logged daily infection rate. We made this decision for the same reasons as described in Section 5.1.1. For models regressing the mean of the logged daily infection rate, we specified a start date of April 1, 2020 to avoid undefined values when taking the log of a 0 infection rate.

To capture uncertainty associated with model inputs, we fit 100 independent models for each factor of interest, using the 100 estimates of infections produced by IHME for each location-day. To capture parameter uncertainty, we generated 100 estimates of the beta coefficient by sampling from a multivariate normal distribution where the mean was defined by the point estimates for fitted betas and the variance was defined by the variance-covariance matrix. Since each of the 100 draws of infections generated 100 draws of the beta coefficients, the resulting analysis generated 10,000 estimates for each factor of interest. We summarized these draws by reporting the mean value as well as the 95% uncertainty interval (UI), which is based on the 2.5<sup>th</sup> and 97.5<sup>th</sup> percentile of the 10,000 estimates.

### 4.3 Modeling GDP

Quarterly Real GDP data by state and industry from 2018-2022 was downloaded from the U.S. Bureau of Economic Analysis (BEA) expressed in millions of chained 2012 dollars. In order to industry-standardise state GDP to compare across state, we generated industry weights using the Q4 2019 values. The table below lists all 23 industries included and the associated weight. As a robustness check we compared these weights to the average across each quarter of 2019 and found the values to be highly correlated.

The GDP data was very complete with less than 5% missingness due to disclosure suppressions or confidential information. However, suppressed estimates were included in higher level totals. We handled missing data through a series of imputation methods. For example, if an estimate was missing for a particular quarter, we forward filled state fractions using historical values. If estimates were missing across all quarters, we used the mean fraction from adjacent states. Once industry standardized, GDP was transformed into per capita space using 2019 population estimates from the Global Burden of Disease Study (CITE).

Our dependent variable for GDP is expressed as observed GDP relative to expected GDP over the time period of interest. In order to generate our counterfactual of expected GDP in absence of COVID-19 we used the average slope between 2018 – 2019 to forecast GDP through 2022. GDP was treated as a stepwise function over time meaning for each day within a quarter, the value was constant. Ultimately, the final variable was constructed by taking the ratio of cumulative observed GDP to cumulative expected GDP. A value less than 100 represents a state that did not meet their expected GDP in absence of COVID-19 while a value above 100 represents a state that had their cumulative GDP surpass the expected GDP during the timer period of interest.

| Industry                                      | National Fraction |
|-----------------------------------------------|-------------------|
| Agriculture, forestry, fishing and hunting    | 0.0115            |
| Mining, quarrying, and oil and gas extraction | 0.0263            |
| Utilities                                     | 0.0154            |
| Construction                                  | 0.0352            |
| Durable goods manufacturing                   | 0.0645            |

|                                                                          |        |
|--------------------------------------------------------------------------|--------|
| Nondurable goods manufacturing                                           | 0.0531 |
| Wholesale trade                                                          | 0.0578 |
| Retail trade                                                             | 0.0589 |
| Transportation and warehousing                                           | 0.0293 |
| Information                                                              | 0.0665 |
| Finance and insurance                                                    | 0.0669 |
| Real estate and rental and leasing                                       | 0.1227 |
| Professional, scientific, and technical services                         | 0.0811 |
| Management of companies and enterprises                                  | 0.0229 |
| Administrative and support and waste management and remediation services | 0.0304 |
| Educational services                                                     | 0.0119 |
| Health care and social assistance                                        | 0.0762 |
| Arts, entertainment, and recreation                                      | 0.0107 |
| Accommodation and food services                                          | 0.0277 |
| Other services (except government and government enterprises)            | 0.0194 |
| Federal civilian                                                         | 0.0221 |
| Military                                                                 | 0.0096 |
| State and local                                                          | 0.0798 |

#### 4.4 Modeling Employment

Because the covid pandemic had a differential impact on different sectors of the economy, we sector-standardised our employment measure. Sector weights were created using the U.S. employment for Q4 of 2019. As a robustness check, all 12 months of 2019 were used to create sector weights, which resulted in nearly identical weights. Monthly, seasonally adjusted employment time series data for each state-sector was obtained from FRED ([fred.stlouisfed.org](http://fred.stlouisfed.org)). The sectors used in our analysis were:

- Construction, Mining, and Logging
- Education and Health Services
- Financial Activities
- Government
- Information
- Leisure and Hospitality
- Manufacturing
- Professional and Business Services
- Other Services
- Trade, Transportation, and Utilities

The employment metric used as the dependent value was constructed as follows. First, we construct the ratio of sector-standardised employment to a counterfactual in which per-capita employment remained constant at the average Q4 2019 level. This ratio is summed across the time period and then normalized so that a value of 1 would indicate full employment (matching the counterfactual) across the entire time period.

#### 4.5 Modeling Education

National Assessment of Educational Progress (NAEP) assessment scores were downloaded from the National Center for Education Statistics. State level scores were downloaded for 2019 and 2022 for the following grade and subject combinations:

- 4<sup>th</sup> grade math
- 8<sup>th</sup> grade math
- 4<sup>th</sup> grade reading
- 8<sup>th</sup> grade reading

The NAEP sampling process is designed to be representative of the entire student population in the USA; therefore we did not make additional adjustments to the reported results.

A model is estimated for each subject-grade. Our dependent variable for education is expressed as the change in score from 2019 to 2022. The NAEP was administered between January and March in 2022. Therefore, the midpoint of this range, February 15, 2022 was used as the end date for test score analyses.

## Section 5: Sensitivity Analyses

### 5.1 Infection and death results using the logged cumulative rate as the dependent variable for all models

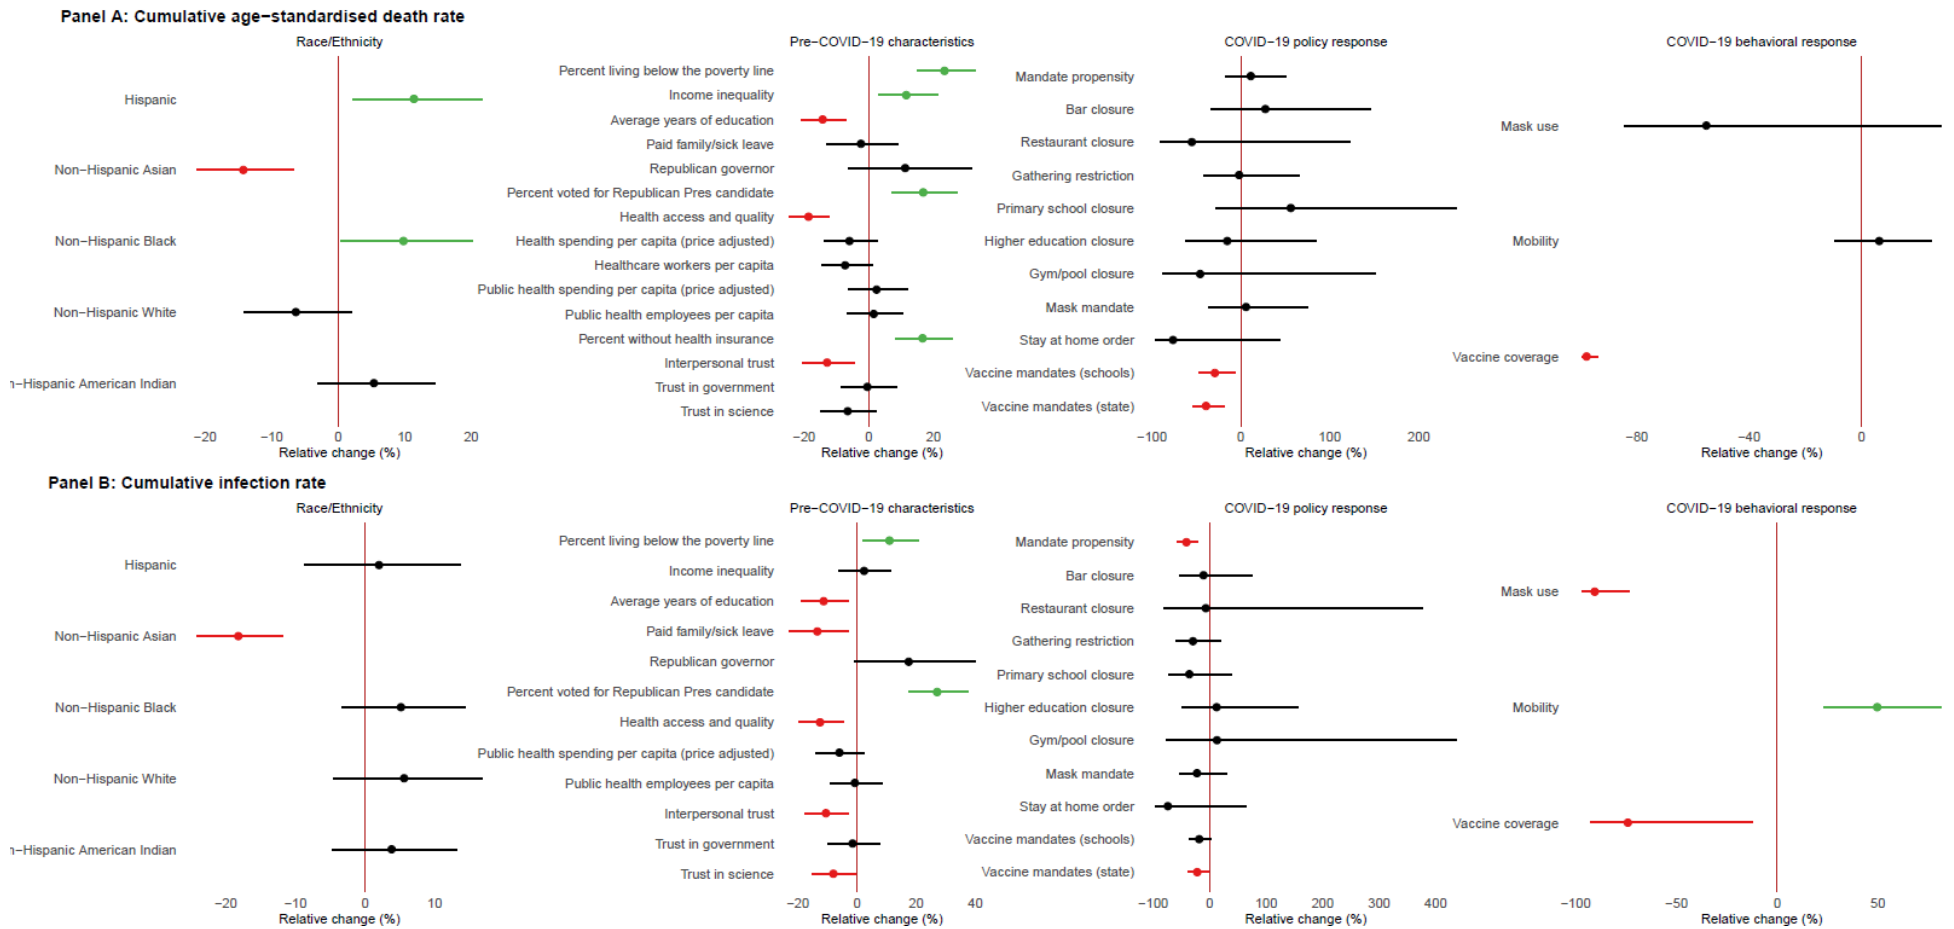

Panel A reports the relative reduction or increase in cumulative age-adjusted deaths per capita that was associated with race/ethnicity, pre-COVID-19 state characteristics, COVID-19 policy response, and COVID-19 behavioural response. The dependent variable is specified as the logged cumulative death rate. The cumulative death rate models control for comorbidity, constructed as the first principal component of asthma, cancer, COPD, cardiovascular disease, diabetes, BMI, and smoking prevalence. The models assessing COVID-19 policy response (other than mandate propensity) also include an additional control variable that was the first component of all the other policy responses. These estimated associations are not reported. The reported associations for the policy response should be interpreted as additional to the association tied to the mandate propensity variable. Panel B reports the relative reduction or increase in cumulative infections per capita that was associated with race/ethnicity, pre-COVID-19 state characteristics, COVID-19 policy response, and COVID-19 behavioural response. The cumulative infection rate models control for population density. The dependent variable is specified as the logged cumulative infection rate. Error bars show

95% confidence intervals that account for death data uncertainty, and markers that are green or red are statistically significant at the 95% level. In this sensitivity analysis, all dependent variables were specified as the logged cumulative rate. This is in contrast to the main analysis, for which models examining time-varying factors (such as policy and behavioral response variables) employed the mean of the log-transformed daily rate as the dependent variable.



## 5.2 Infection and death results using negative binomial model

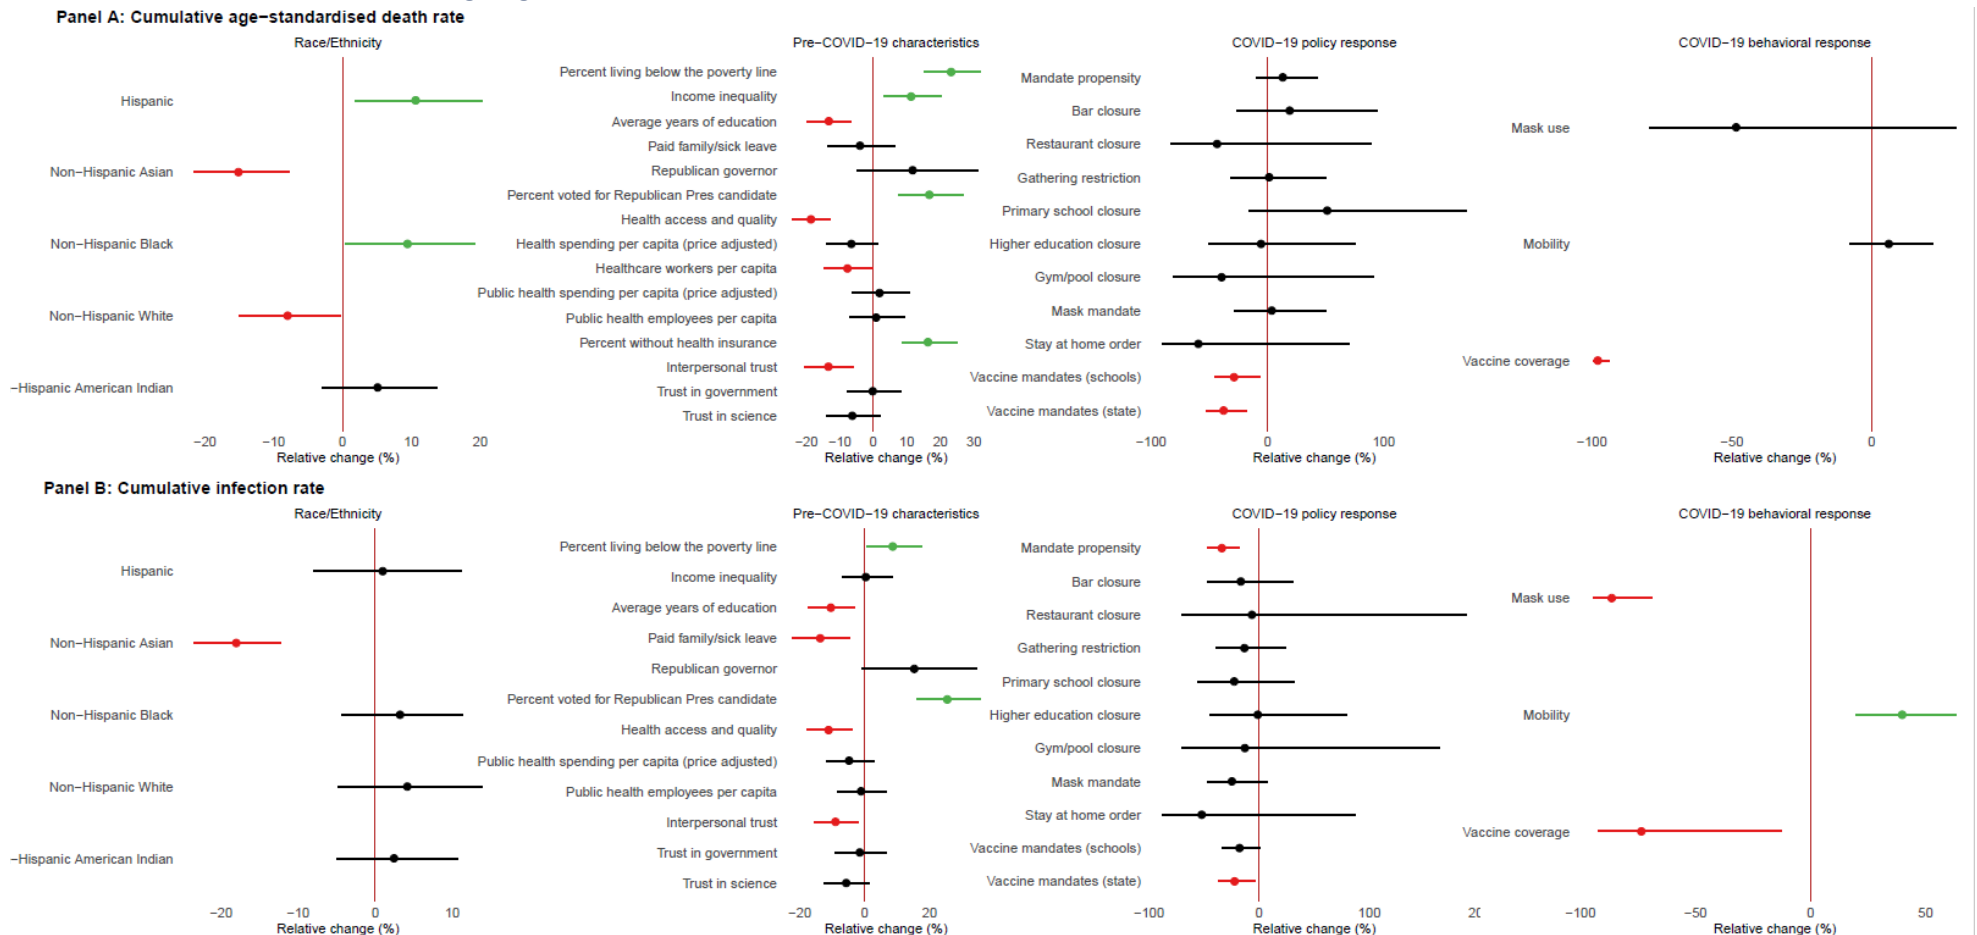

Panel A reports the relative reduction or increase in cumulative age-adjusted deaths per capita that was associated with race/ethnicity, pre-COVID-19 state characteristics, COVID-19 policy response, and COVID-19 behavioural response. The cumulative death rate models control for comorbidity, constructed as the first principal component of asthma, cancer, COPD, cardiovascular disease, diabetes, BMI, and smoking prevalence. The models assessing COVID-19 policy response (other than mandate propensity) also include an additional control variable that was the first component of all the other policy responses. These estimated associations are not reported. The reported associations for the policy response should be interpreted as additional to the association tied to the mandate propensity variable. Panel B reports the relative reduction or increase in cumulative infections per capita that was associated with race/ethnicity, pre-COVID-19 state characteristics, COVID-19 policy response, and COVID-19 behavioural response. The cumulative infection rate models control for population density. Error bars show 95% confidence intervals that account for death data uncertainty, and markers that are green or red are statistically significant at the 95% level. All models in this sensitivity analysis were specified as a negative binomial generalized linear model.

### 5.3 Infection and death results including poverty as a control for COVID-19 policies and behaviors

**Panel A: Cumulative age-standardised death rate**

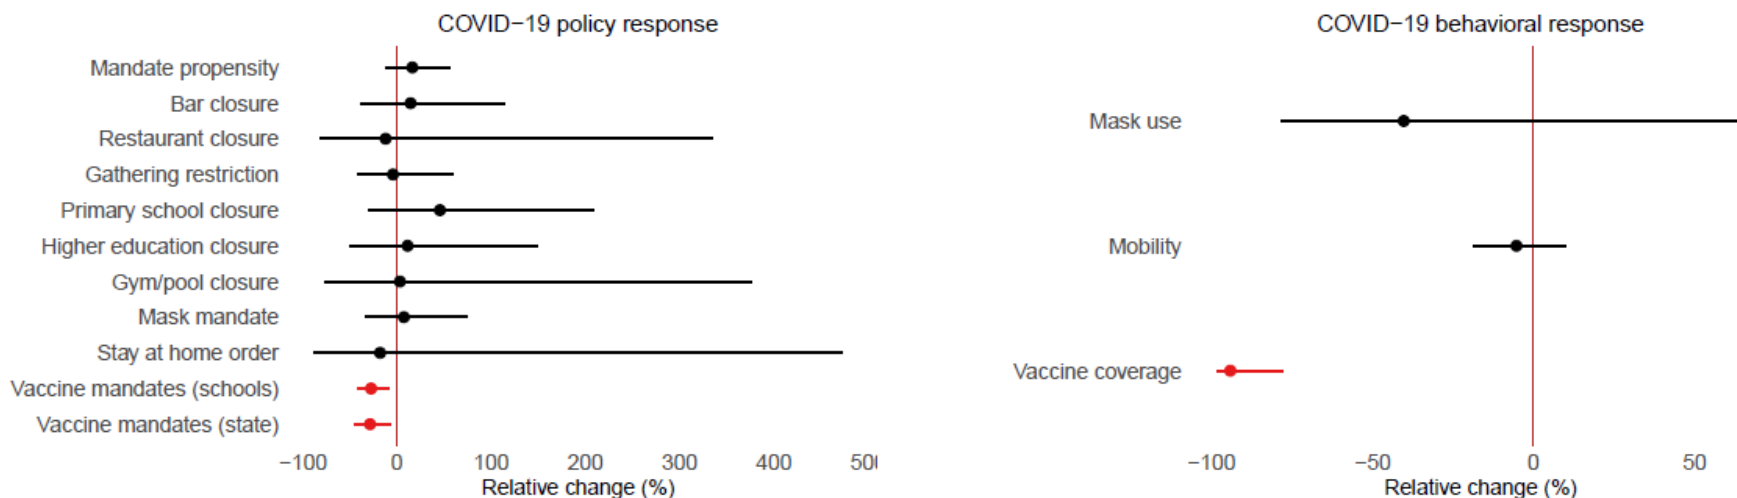

**Panel B: Cumulative infection rate**

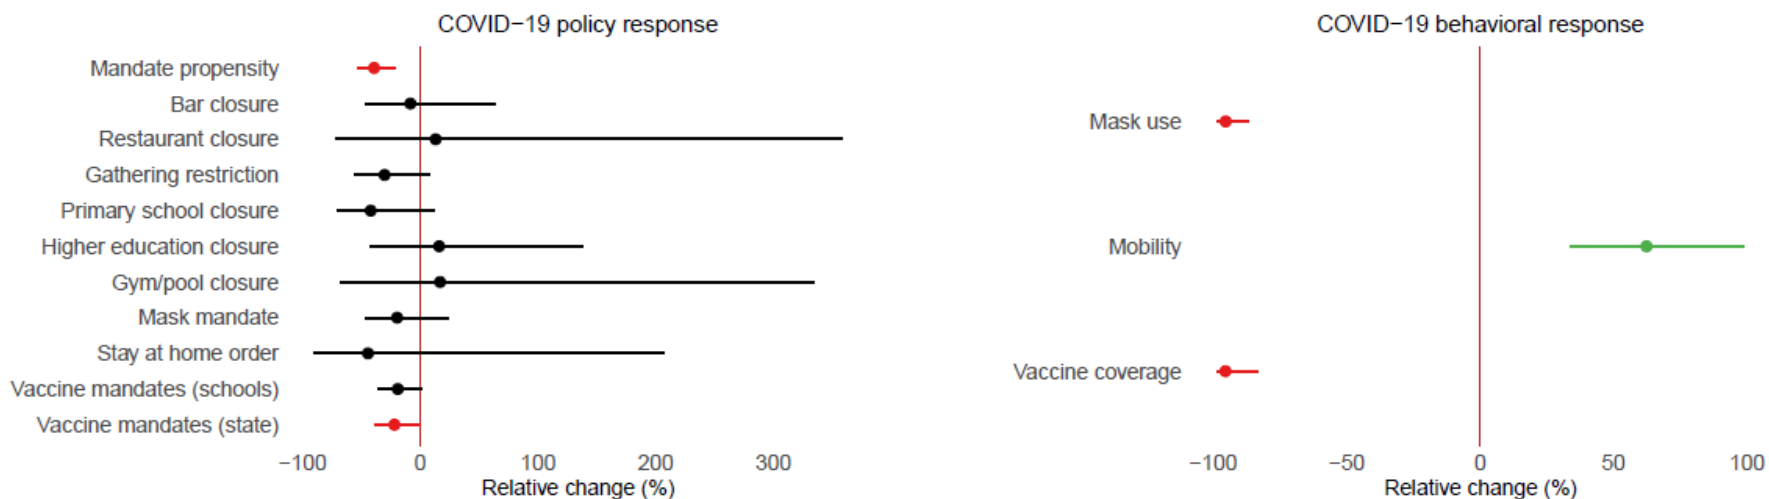

Panel A reports the relative reduction or increase in cumulative age-adjusted deaths per capita that was associated with COVID-19 policy and behavioural response. The cumulative death rate models control for poverty and comorbidity, constructed as the first principal component of asthma, cancer, COPD, cardiovascular disease, diabetes, BMI, and smoking prevalence. Panel B reports the relative reduction or increase in cumulative infections per capita that was associated with COVID-19 policy and behavioural response. The cumulative infection rate models control for poverty and population density. The models assessing COVID-19 policy response (other than mandate propensity) also include an additional control variable that was the first component of all the other

policy responses. These estimated associations are not reported. The reported associations for the policy response should be interpreted as additional to the association tied to the mandate propensity variable. Error bars show 95% confidence intervals that account for death data uncertainty, and markers that are green or red are statistically significant at the 95% level.

5.4 Infection and death results including the first principal component of a PCA of all statistically significant pre-COVID-19 factors as control variables for COVID-19 policies and behaviours

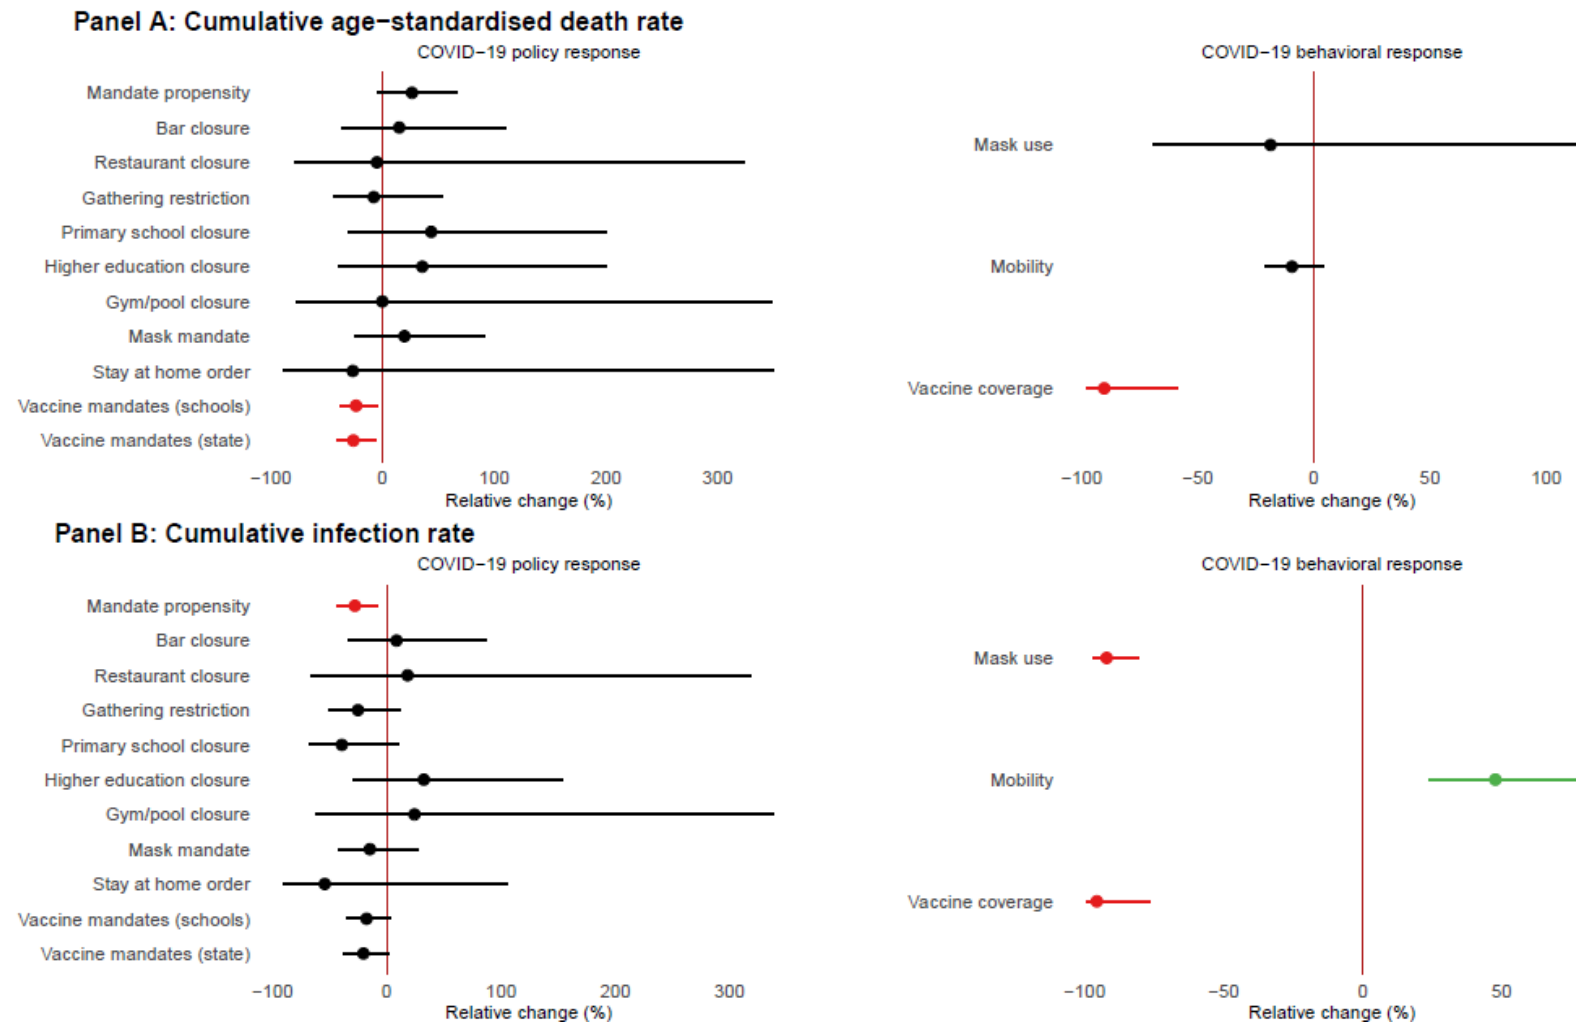

Panel A reports the relative reduction or increase in cumulative age-adjusted deaths per capita that was associated with COVID-19 policy and behavioural response. The cumulative death rate models control for comorbidity and statistically significant pre-COVID factors from the main analysis, constructed as the first principal component of poverty, inequality, education attainment, health access and quality, percent of the population without health insurance, and interpersonal trust. Panel B reports the relative reduction or increase in cumulative infections per capita that was associated with COVID-19 policy and behavioural response. The cumulative infection rate models control for population density and statistically significant pre-COVID factors from the main analysis, constructed as the first principal component of poverty, education attainment, existence of state-funded paid medical or family leave, health access and quality,

interpersonal trust, and trust in science. The models assessing COVID-19 policy response (other than mandate propensity) also include an additional control variable that was the first component of all the other policy responses. Error bars show 95% confidence intervals that account for death data uncertainty, and markers that are green or red are statistically significant at the 95% level.

## 5.5 Death results without control variables

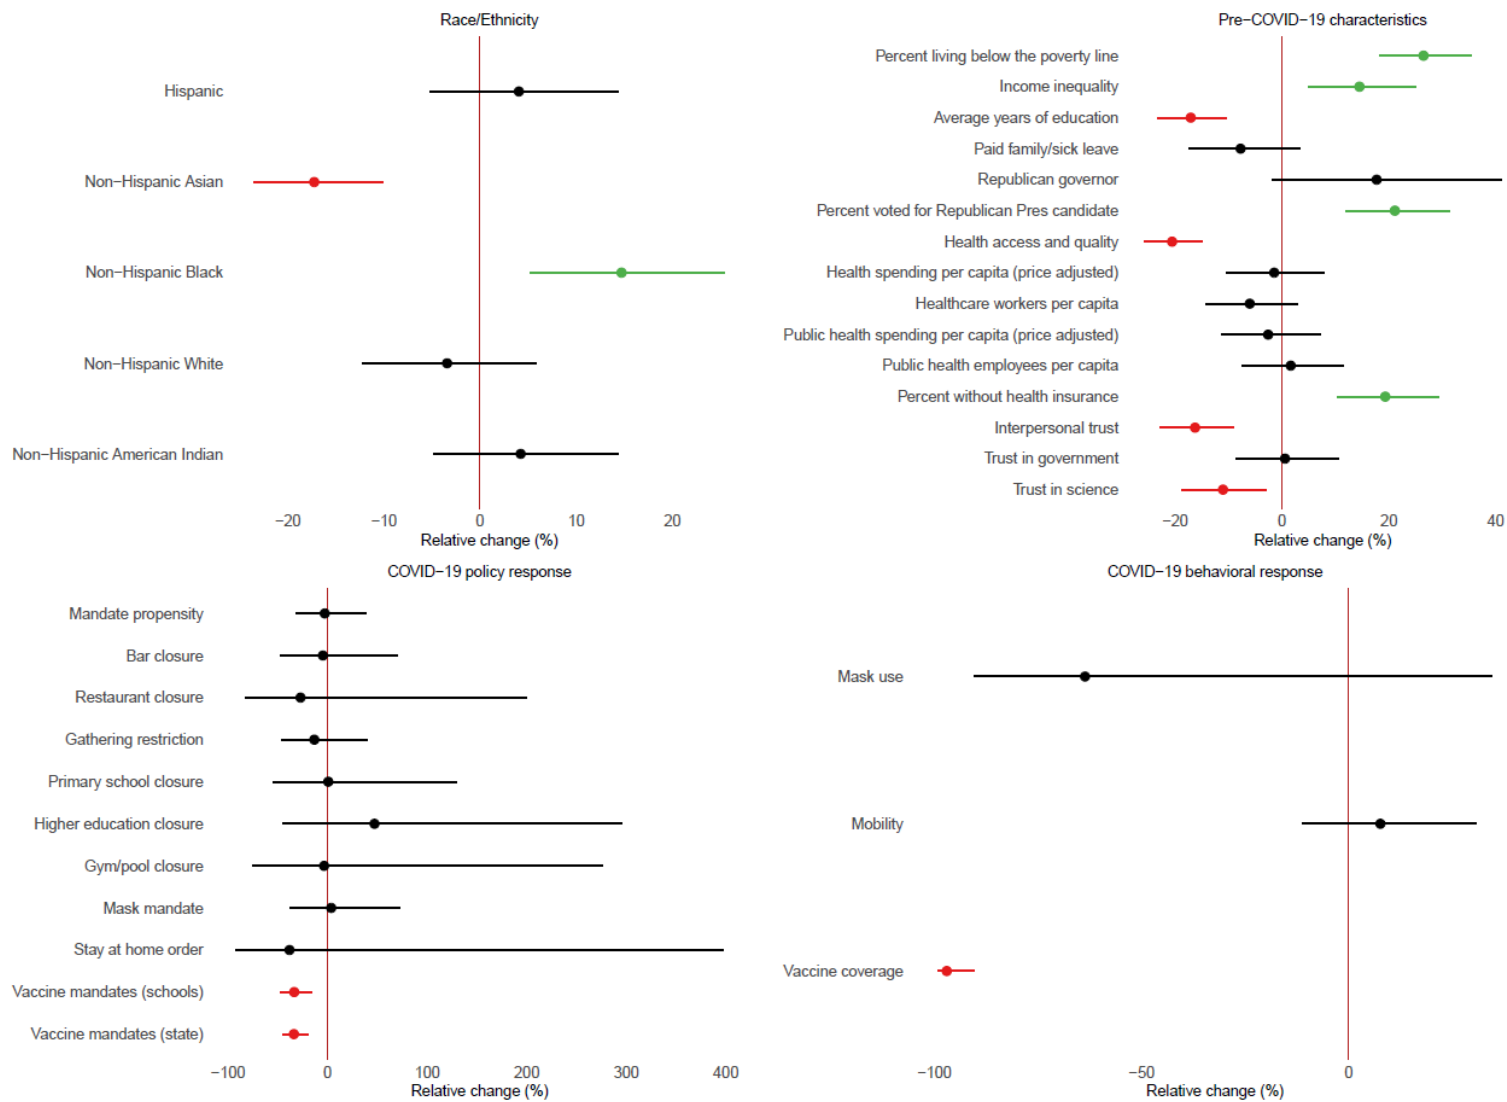

Figure 5.5 reports the relative reduction or increase in cumulative age-adjusted deaths per capita that was associated with race/ethnicity, pre-COVID-19 state characteristics, COVID-19 policy response, and COVID-19 behavioural response. In this sensitivity analysis, we did not adjust for underlying comorbidities. The models assessing COVID-19 policy response (other than mandate propensity) do include an additional covariate representing the first principal component of a PCA of all other policy responses. Error bars show 95% confidence intervals that account for death data uncertainty, and markers that are green or red are statistically significant at the 95% level.

## 5.6 Death results with no control variables and no age standardization of cumulative death rate

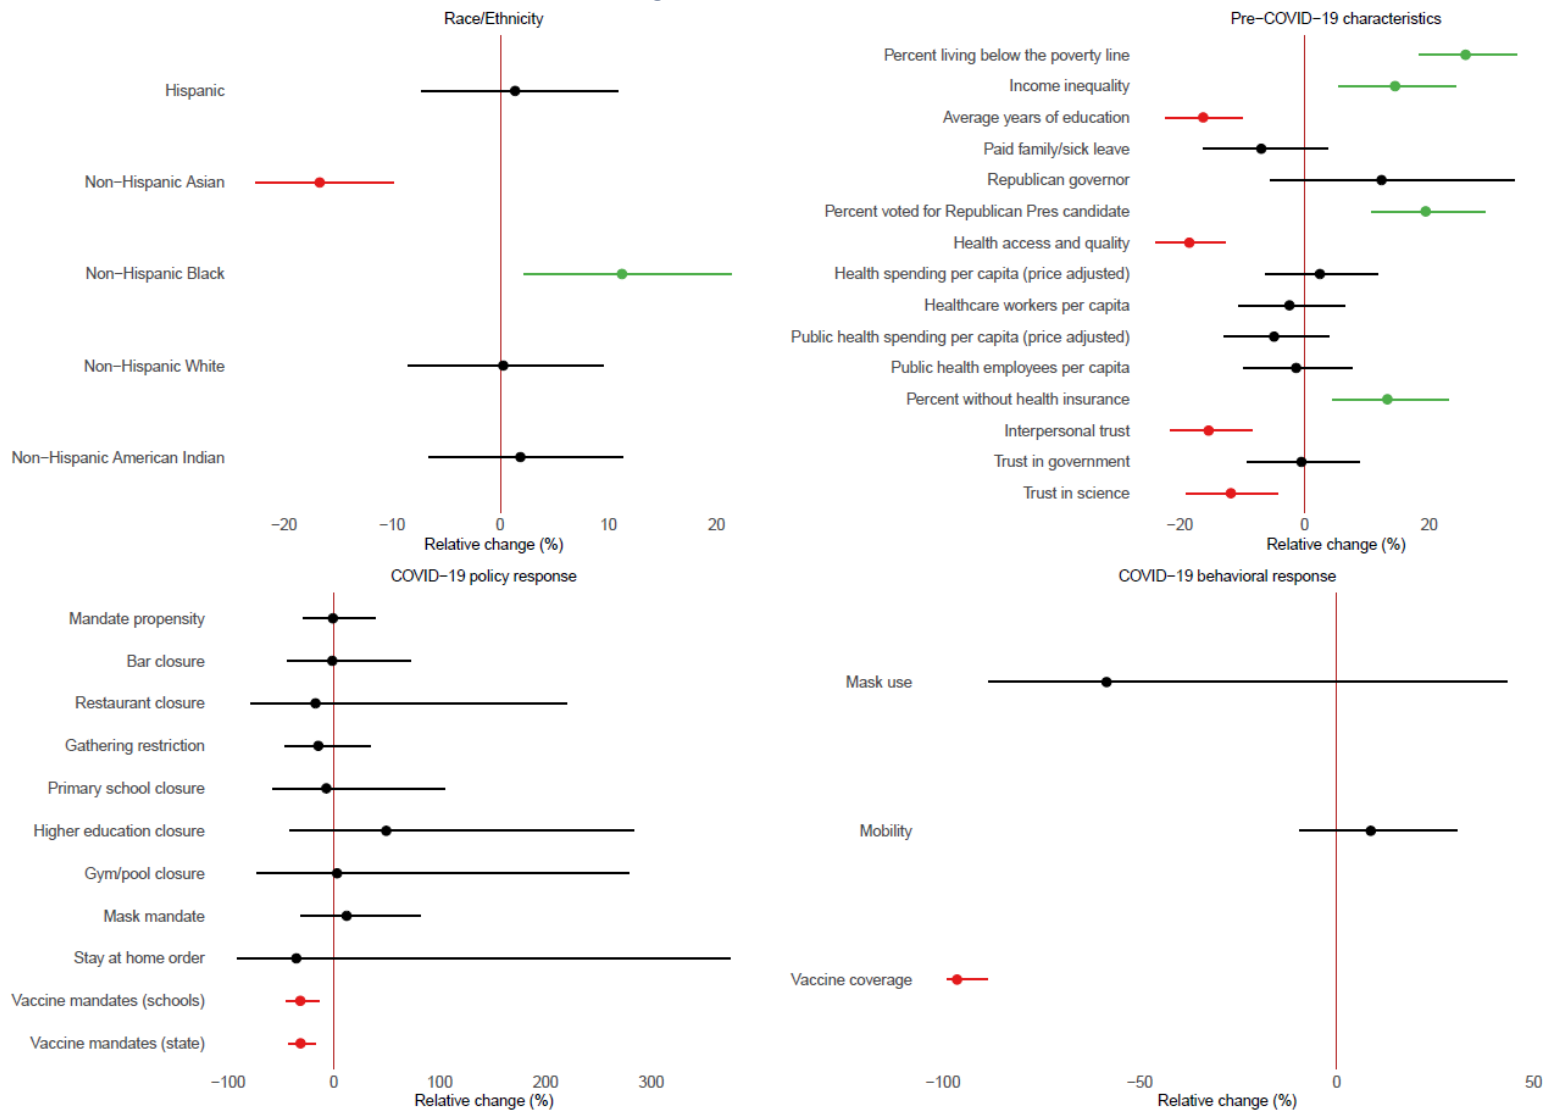

Figure 5.6 reports the relative reduction or increase in cumulative deaths per capita that was associated with race/ethnicity, pre-COVID-19 state characteristics, COVID-19 policy response, and COVID-19 behavioural response. In this sensitivity analysis, we did not age-adjust the cumulative death rate and did not adjust for underlying comorbidities or any other control variables. The models assessing COVID-19 policy response (other than mandate propensity) do include a covariate representing the first principal component of a PCA of all other policy responses. Error bars show 95% confidence intervals that account for death data uncertainty, and markers that are green or red are statistically significant at the 95% level.

## 5.7 Death results without control variables, dependent variable specified as cumulative reported deaths per capita

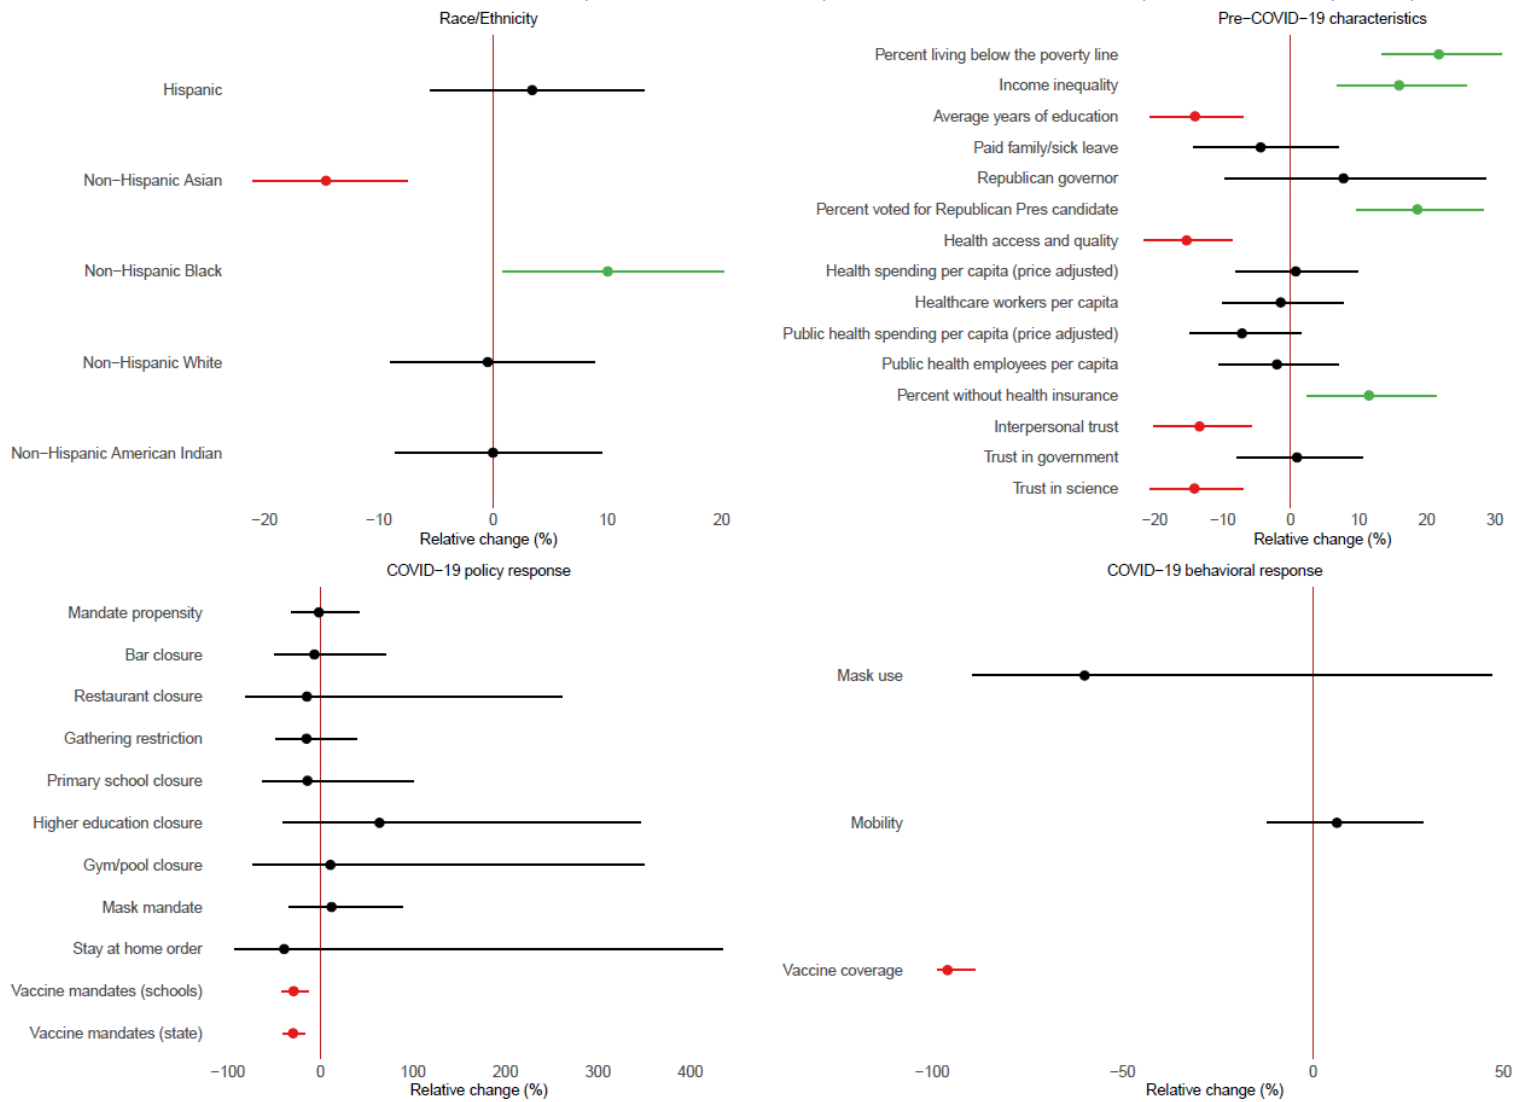

Figure 5.7 reports the relative reduction or increase in cumulative deaths per capita that was associated with race/ethnicity, pre-COVID-19 state characteristics, COVID-19 policy response, and COVID-19 behavioural response. In this sensitivity analysis, the dependent variable was specified as cumulative reported deaths per capita. Additionally, we did not adjust for underlying comorbidities or any other control variables. The models assessing COVID-19 policy response (other than mandate propensity) do include a covariate representing the first principal component of a PCA of all other policy responses. Error bars show 95% confidence intervals that account for death data uncertainty, and markers that are green or red are statistically significant at the 95% level.



## 5.8 Reporting E-Values for unmeasured confounding

We used the `EValue` package in R (VanderWeele TJ, Ding P (2011). “Sensitivity analysis in observational research: introducing the E-value.” *Annals of Internal Medicine*, 167(4), 268–274.) to conduct a sensitivity analysis, calculating E-values for the assessment of unmeasured confounding. E-value is defined as the minimum association (on a risk ratio scale) that an unmeasured confounder would need to have with both the exposure and the outcome to fully explain away the observed treatment-outcome association, conditioned on measured covariates. A small E-value indicates that only a small amount of unmeasured confounding is needed to explain away the effect size estimate. Conversely, a large E-value indicates that a substantial amount of unmeasured confounding would be needed to explain away the effect size estimate.

### *E-Values for cumulative infection rate regressions*

| <b>Factor</b>                                      | <b>E-value</b> |
|----------------------------------------------------|----------------|
| Non-Hispanic White                                 | 1.6            |
| Non-Hispanic Black                                 | 1.6            |
| Non-Hispanic Asian                                 | 3.1            |
| Non-Hispanic American Indian                       | 1.5            |
| Hispanic                                           | 1.3            |
| percent living below the poverty line              | 2.1            |
| income inequality                                  | 1.4            |
| health access and quality                          | 2.4            |
| public health employees per capita                 | 1.2            |
| public health spending per capita (price adjusted) | 1.7            |
| Republican governor                                | 2.7            |
| percent voted for Republican Pres candidate        | 3.6            |
| interpersonal trust                                | 2.2            |
| trust in science                                   | 1.9            |
| trust in government                                | 1.3            |
| paid family/sick leave                             | 2.5            |
| average years of education                         | 2.2            |
| citizen party affiliation                          | 2.9            |
| govt party affiliation                             | 3.3            |
| state house polarization                           | 1.2            |
| state senate polarization                          | 1.2            |
| affective polarization                             | 1.8            |
| economic connectedness                             | 2.2            |
| social clustering                                  | 1.6            |

|                            |        |
|----------------------------|--------|
| volunteering rate          | 1.4    |
| mask mandate               | 2.7    |
| stay at home order         | 13.6   |
| restaurant closure         | 2.2    |
| bar closure                | 1.4    |
| gathering restriction      | 2.8    |
| primary school closure     | 3.1    |
| higher education closure   | 2.7    |
| gym/pool closure           | 1.8    |
| vaccine mandates (schools) | 3.6    |
| vaccine mandates (state)   | 4.3    |
| mandate propensity         | 3.9    |
| mask use                   | 1157.7 |
| mobility                   | 5.2    |
| vaccine coverage           | 5104.8 |

*E-Values for cumulative death rate regressions*

| <b>Factor</b>                                      | <b>E-value</b> |
|----------------------------------------------------|----------------|
| Non-Hispanic White                                 | 1.7            |
| Non-Hispanic Black                                 | 1.9            |
| Non-Hispanic Asian                                 | 2.5            |
| Non-Hispanic American Indian                       | 1.6            |
| Hispanic                                           | 2.1            |
| percent living below the poverty line              | 3.1            |
| income inequality                                  | 2.1            |
| health access and quality                          | 3.0            |
| health spending per capita (price adjusted)        | 1.7            |
| public health spending per capita (price adjusted) | 1.3            |
| public health employees per capita                 | 1.3            |
| hospital beds per capita                           | 1.6            |
| ICU beds per capita                                | 2.2            |
| physicians per capita                              | 1.7            |
| healthcare workers per capita                      | 1.8            |

|                                             |         |
|---------------------------------------------|---------|
| percent without health insurance            | 2.5     |
| Republican governor                         | 2.1     |
| percent voted for Republican Pres candidate | 2.5     |
| interpersonal trust                         | 2.3     |
| trust in science                            | 1.7     |
| trust in government                         | 1.1     |
| paid family/sick leave                      | 1.4     |
| average years of education                  | 2.5     |
| citizen party affiliation                   | 2.2     |
| govt party affiliation                      | 2.5     |
| state house polarization                    | 1.1     |
| state senate polarization                   | 1.2     |
| affective polarization                      | 1.8     |
| economic connectedness                      | 3.0     |
| social clustering                           | 1.6     |
| volunteering rate                           | 1.8     |
| mask mandate                                | 1.1     |
| stay at home order                          | 8.2     |
| restaurant closure                          | 4.7     |
| bar closure                                 | 2.3     |
| gathering restriction                       | 1.6     |
| primary school closure                      | 4.4     |
| higher education closure                    | 1.2     |
| gym/pool closure                            | 4.5     |
| vaccine mandates (schools)                  | 4.1     |
| vaccine mandates (state)                    | 6.3     |
| mandate propensity                          | 2.1     |
| mask use                                    | 4.5     |
| mobility                                    | 1.3     |
| vaccine coverage                            | 11174.8 |

## Section 6: Supplementary Results

### 6.1 Factors associated with age-adjusted cumulative death rates and cumulative infection rates

The below table shows relative reductions or increases in cumulative age-adjusted deaths or infections per capita that were associated with race and ethnicity (proportions of state population), pre-COVID-19 state characteristics, COVID-19 policy responses, and COVID-19 behavioural responses. The uncertainty interval (UI) around the estimate accounts for uncertainty in death or infection data. The cumulative death rate models controlled for comorbidity using the first principal component of a PCA of asthma, cancer, chronic obstructive pulmonary disease, cardiovascular disease, diabetes, BMI, and smoking prevalence. The models assessing COVID-19 policy responses (other than mandate propensity) also include an additional control variable that was the first component of all the other policy responses. The reported associations for the policy response should be interpreted as additional to the association tied to the mandate propensity variable. The values shown in this table correspond with Figure 3 in the main text.

#### *Factors associated with age-adjusted cumulative death rates and cumulative infection rates*

| Dependent Variable | Factor                                | Category                    | Analysis Period                  | Relative Change | Lower UI | Upper UI | p-value | Relative change expressed with respect to change of |
|--------------------|---------------------------------------|-----------------------------|----------------------------------|-----------------|----------|----------|---------|-----------------------------------------------------|
| Deaths             | Hispanic                              | Race/Ethnicity              | 01 January, 2020 - 31 July, 2022 | 11.38           | 2.14     | 21.65    | 0.008   | 0% Hispanic vs 100% Hispanic                        |
| Deaths             | Non-Hispanic Asian                    | Race/Ethnicity              | 01 January, 2020 - 31 July, 2022 | -14.27          | -21.24   | -6.67    | >0.001  | 0% Asian vs 100% Asian                              |
| Deaths             | Non-Hispanic Black                    | Race/Ethnicity              | 01 January, 2020 - 31 July, 2022 | 9.81            | 0.43     | 20.21    | 0.021   | 0% Black vs 100% Black                              |
| Deaths             | Non-Hispanic White                    | Race/Ethnicity              | 01 January, 2020 - 31 July, 2022 | -6.37           | -14.17   | 2.11     | 0.070   | 0% White vs 100% White                              |
| Deaths             | Non-Hispanic American Indian          | Race/Ethnicity              | 01 January, 2020 - 31 July, 2022 | 5.36            | -2.99    | 14.50    | 0.107   | 0% American Indian vs 100% American Indian          |
| Deaths             | Percent living below the poverty line | Pre-COVID-19 characteristic | 01 January, 2020 - 31 July, 2022 | 23.42           | 14.84    | 32.77    | >0.001  | 1 SD increase from the national mean                |
| Deaths             | Income inequality                     | Pre-COVID-19 characteristic | 01 January, 2020 - 31 July, 2022 | 11.59           | 3.13     | 21.30    | 0.004   | 1 SD increase from the national mean                |
| Deaths             | Average years of education            | Pre-COVID-19 characteristic | 01 January, 2020 - 31 July, 2022 | -14.25          | -20.83   | -6.99    | >0.001  | 1 SD increase from the national mean                |
| Deaths             | Paid family/sick leave                | Pre-COVID-19 characteristic | 01 January, 2020 - 31 July, 2022 | -2.41           | -12.89   | 9.00     | 0.329   | Reference category: no leave                        |
| Deaths             | Republican governor                   | Pre-COVID-19 characteristic | 01 January, 2020 - 31 July, 2022 | 11.25           | -6.28    | 31.97    | 0.114   | Reference category: Democrat                        |

|        |                                                    |                             |                                  |        |        |        |        |                                                                          |
|--------|----------------------------------------------------|-----------------------------|----------------------------------|--------|--------|--------|--------|--------------------------------------------------------------------------|
| Deaths | Percent voted for Republican Pres candidate        | Pre-COVID-19 characteristic | 01 January, 2020 - 31 July, 2022 | 16.83  | 7.08   | 27.48  | >0.001 | 1 SD increase from the national mean                                     |
| Deaths | Health access and quality                          | Pre-COVID-19 characteristic | 01 January, 2020 - 31 July, 2022 | -18.62 | -24.51 | -12.27 | >0.001 | 1 SD increase from the national mean                                     |
| Deaths | Health spending per capita (price adjusted)        | Pre-COVID-19 characteristic | 01 January, 2020 - 31 July, 2022 | -5.96  | -13.71 | 2.66   | 0.085  | 1 SD increase from the national mean                                     |
| Deaths | Healthcare workers per capita                      | Pre-COVID-19 characteristic | 01 January, 2020 - 31 July, 2022 | -7.30  | -14.62 | 1.10   | 0.041  | 1 SD increase from the national mean                                     |
| Deaths | Public health spending per capita (price adjusted) | Pre-COVID-19 characteristic | 01 January, 2020 - 31 July, 2022 | 2.41   | -6.24  | 12.10  | 0.300  | 1 SD increase from the national mean                                     |
| Deaths | Public health employees per capita                 | Pre-COVID-19 characteristic | 01 January, 2020 - 31 July, 2022 | 1.53   | -6.56  | 10.44  | 0.364  | 1 SD increase from the national mean                                     |
| Deaths | Percent without health insurance                   | Pre-COVID-19 characteristic | 01 January, 2020 - 31 July, 2022 | 16.64  | 8.39   | 25.84  | >0.001 | 1 SD increase from the national mean                                     |
| Deaths | Interpersonal trust                                | Pre-COVID-19 characteristic | 01 January, 2020 - 31 July, 2022 | -12.88 | -20.44 | -4.45  | 0.002  | 1 SD increase from the national mean                                     |
| Deaths | Trust in government                                | Pre-COVID-19 characteristic | 01 January, 2020 - 31 July, 2022 | -0.43  | -8.68  | 8.52   | 0.459  | 1 SD increase from the national mean                                     |
| Deaths | Trust in science                                   | Pre-COVID-19 characteristic | 01 January, 2020 - 31 July, 2022 | -6.51  | -14.81 | 2.40   | 0.072  | 1 SD increase from the national mean                                     |
| Deaths | Mandate propensity                                 | COVID-19 policy response    | 01 April, 2020 - 01 June, 2021   | 23.59  | -9.53  | 70.70  | 0.100  | Mandates never used vs mandate usage similar to that of Washington state |
| Deaths | Bar closure                                        | COVID-19 policy response    | 01 April, 2020 - 01 June, 2021   | 27.88  | -35.08 | 159.83 | 0.243  | Mandate never used vs mandate in effect for 100% of analysis period      |
| Deaths | Restaurant closure                                 | COVID-19 policy response    | 01 April, 2020 - 01 June, 2021   | -47.06 | -90.19 | 192.98 | 0.233  | Mandate never used vs mandate in effect for 100% of analysis period      |
| Deaths | Gathering restriction                              | COVID-19 policy response    | 01 April, 2020 - 01 June, 2021   | 8.96   | -36.97 | 89.40  | 0.382  | Mandate never used vs mandate in effect for 100% of analysis period      |

|            |                            |                              |                                      |        |        |        |        |                                                                           |
|------------|----------------------------|------------------------------|--------------------------------------|--------|--------|--------|--------|---------------------------------------------------------------------------|
| Deaths     | Primary school closure     | COVID-19 policy response     | 01 April, 2020 - 01 June, 2021       | 79.68  | -20.83 | 307.42 | 0.081  | Mandate never used vs mandate in effect for 100% of analysis period       |
| Deaths     | Higher education closure   | COVID-19 policy response     | 01 April, 2020 - 01 June, 2021       | 1.78   | -58.76 | 145.63 | 0.481  | Mandate never used vs mandate in effect for 100% of analysis period       |
| Deaths     | Gym/pool closure           | COVID-19 policy response     | 01 April, 2020 - 01 June, 2021       | -44.89 | -88.90 | 187.30 | 0.236  | Mandate never used vs mandate in effect for 100% of analysis period       |
| Deaths     | Mask mandate               | COVID-19 policy response     | 01 April, 2020 - 01 June, 2021       | 0.54   | -39.96 | 69.02  | 0.492  | Mandate never used vs mandate in effect for 100% of analysis period       |
| Deaths     | Stay at home order         | COVID-19 policy response     | 01 April, 2020 - 01 June, 2021       | -62.04 | -95.16 | 189.81 | 0.181  | Mandate never used vs mandate in effect for 100% of analysis period       |
| Deaths     | Vaccine mandates (schools) | COVID-19 policy response     | 15 March, 2021 - 31 July, 2022       | -29.30 | -47.02 | -5.85  | 0.009  | Reference category: no history of mandate                                 |
| Deaths     | Vaccine mandates (state)   | COVID-19 policy response     | 15 March, 2021 - 31 July, 2022       | -39.22 | -54.17 | -18.62 | >0.001 | Reference category: no history of mandate                                 |
| Deaths     | Mask use                   | COVID-19 behavioral response | 01 April, 2020 - 31 July, 2022       | -34.09 | -81.10 | 129.46 | 0.261  | 0% to 100% of the population wears a mask every time they leave the house |
| Deaths     | Mobility                   | COVID-19 behavioral response | 01 April, 2020 - 31 July, 2022       | -1.76  | -18.50 | 18.31  | 0.424  | 1 SD increase from the national mean change from pre-pandemic baseline    |
| Deaths     | Vaccine coverage           | COVID-19 behavioral response | 15 March, 2021 - 31 July, 2022       | -97.42 | -99.27 | -90.97 | >0.001 | 0% of population vaccinated vs 100% vaccinated for entire analysis period |
| Infections | Hispanic                   | Race/Ethnicity               | 01 January, 2020 - 15 December, 2021 | 1.99   | -8.65  | 13.73  | 0.358  | 0% Hispanic vs 100% Hispanic                                              |
| Infections | Non-Hispanic Asian         | Race/Ethnicity               | 01 January, 2020 - 15 December, 2021 | -18.20 | -24.14 | -11.86 | >0.001 | 0% Asian vs 100% Asian                                                    |
| Infections | Non-Hispanic Black         | Race/Ethnicity               | 01 January, 2020 - 15 December, 2021 | 5.14   | -3.29  | 14.42  | 0.120  | 0% Black vs 100% Black                                                    |
| Infections | Non-Hispanic White         | Race/Ethnicity               | 01 January, 2020 - 15 December, 2021 | 5.60   | -4.50  | 16.81  | 0.141  | 0% White vs 100% White                                                    |

|            |                                                    |                             |                                      |        |        |        |        |                                                                          |
|------------|----------------------------------------------------|-----------------------------|--------------------------------------|--------|--------|--------|--------|--------------------------------------------------------------------------|
| Infections | Non-Hispanic American Indian                       | Race/Ethnicity              | 01 January, 2020 - 15 December, 2021 | 3.80   | -4.80  | 13.14  | 0.195  | 0% American Indian vs 100% American Indian                               |
| Infections | Percent living below the poverty line              | Pre-COVID-19 characteristic | 01 January, 2020 - 15 December, 2021 | 10.96  | 1.93   | 20.93  | 0.007  | 1 SD increase from the national mean                                     |
| Infections | Income inequality                                  | Pre-COVID-19 characteristic | 01 January, 2020 - 15 December, 2021 | 2.39   | -5.98  | 11.58  | 0.295  | 1 SD increase from the national mean                                     |
| Infections | Average years of education                         | Pre-COVID-19 characteristic | 01 January, 2020 - 15 December, 2021 | -11.29 | -18.98 | -3.02  | 0.004  | 1 SD increase from the national mean                                     |
| Infections | Paid family/sick leave                             | Pre-COVID-19 characteristic | 01 January, 2020 - 15 December, 2021 | -13.43 | -22.83 | -3.02  | 0.008  | Reference category: no leave                                             |
| Infections | Republican governor                                | Pre-COVID-19 characteristic | 01 January, 2020 - 15 December, 2021 | 17.48  | -0.93  | 39.79  | 0.067  | Reference category: Democrat                                             |
| Infections | Percent voted for Republican Pres candidate        | Pre-COVID-19 characteristic | 01 January, 2020 - 15 December, 2021 | 27.08  | 17.33  | 37.72  | >0.001 | 1 SD increase from the national mean                                     |
| Infections | Health access and quality                          | Pre-COVID-19 characteristic | 01 January, 2020 - 15 December, 2021 | -12.51 | -19.74 | -4.68  | >0.001 | 1 SD increase from the national mean                                     |
| Infections | Public health spending per capita (price adjusted) | Pre-COVID-19 characteristic | 01 January, 2020 - 15 December, 2021 | -5.95  | -13.82 | 2.56   | 0.082  | 1 SD increase from the national mean                                     |
| Infections | Public health employees per capita                 | Pre-COVID-19 characteristic | 01 January, 2020 - 15 December, 2021 | -0.74  | -8.84  | 8.33   | 0.427  | 1 SD increase from the national mean                                     |
| Infections | Interpersonal trust                                | Pre-COVID-19 characteristic | 01 January, 2020 - 15 December, 2021 | -10.51 | -17.66 | -2.78  | 0.005  | 1 SD increase from the national mean                                     |
| Infections | Trust in government                                | Pre-COVID-19 characteristic | 01 January, 2020 - 15 December, 2021 | -1.50  | -9.90  | 7.72   | 0.375  | 1 SD increase from the national mean                                     |
| Infections | Trust in science                                   | Pre-COVID-19 characteristic | 01 January, 2020 - 15 December, 2021 | -8.00  | -15.14 | -0.49  | 0.019  | 1 SD increase from the national mean                                     |
| Infections | Mandate propensity                                 | COVID-19 policy response    | 01 April, 2020 - 01 June, 2021       | -36.27 | -52.66 | -14.55 | 0.002  | Mandates never used vs mandate usage similar to that of Washington state |
| Infections | Bar closure                                        | COVID-19 policy response    | 01 April, 2020 - 01 June, 2021       | -4.77  | -49.19 | 82.79  | 0.437  | Mandate never used vs mandate in effect for 100% of analysis period      |

|            |                            |                              |                                    |        |        |        |        |                                                                           |
|------------|----------------------------|------------------------------|------------------------------------|--------|--------|--------|--------|---------------------------------------------------------------------------|
| Infections | Restaurant closure         | COVID-19 policy response     | 01 April, 2020 - 01 June, 2021     | -17.57 | -83.14 | 303.78 | 0.402  | Mandate never used vs mandate in effect for 100% of analysis period       |
| Infections | Gathering restriction      | COVID-19 policy response     | 01 April, 2020 - 01 June, 2021     | -26.06 | -55.58 | 21.06  | 0.119  | Mandate never used vs mandate in effect for 100% of analysis period       |
| Infections | Primary school closure     | COVID-19 policy response     | 01 April, 2020 - 01 June, 2021     | -29.47 | -67.62 | 50.05  | 0.190  | Mandate never used vs mandate in effect for 100% of analysis period       |
| Infections | Higher education closure   | COVID-19 policy response     | 01 April, 2020 - 01 June, 2021     | 32.39  | -40.08 | 204.60 | 0.248  | Mandate never used vs mandate in effect for 100% of analysis period       |
| Infections | Gym/pool closure           | COVID-19 policy response     | 01 April, 2020 - 01 June, 2021     | -11.35 | -80.27 | 318.34 | 0.435  | Mandate never used vs mandate in effect for 100% of analysis period       |
| Infections | Mask mandate               | COVID-19 policy response     | 01 April, 2020 - 01 June, 2021     | -24.63 | -54.11 | 21.81  | 0.131  | Mandate never used vs mandate in effect for 100% of analysis period       |
| Infections | Stay at home order         | COVID-19 policy response     | 01 April, 2020 - 01 June, 2021     | -67.32 | -95.37 | 117.72 | 0.127  | Mandate never used vs mandate in effect for 100% of analysis period       |
| Infections | Vaccine mandates (schools) | COVID-19 policy response     | 15 March, 2021 - 15 December, 2021 | -18.65 | -35.18 | 1.88   | 0.064  | Reference category: no history of mandate                                 |
| Infections | Vaccine mandates (state)   | COVID-19 policy response     | 15 March, 2021 - 15 December, 2021 | -22.19 | -38.24 | -2.18  | 0.016  | Reference category: no history of mandate                                 |
| Infections | Mask use                   | COVID-19 behavioral response | 01 April, 2020 - 15 December, 2021 | -94.60 | -98.46 | -81.99 | >0.001 | 0% to 100% of the population wears a mask every time they leave the house |
| Infections | Mobility                   | COVID-19 behavioral response | 01 April, 2020 - 15 December, 2021 | 62.13  | 29.61  | 102.54 | >0.001 | 1 SD increase from the national mean change from pre-pandemic baseline    |
| Infections | Vaccine coverage           | COVID-19 behavioral response | 15 March, 2021 - 15 December, 2021 | -93.11 | -97.74 | -78.57 | >0.001 | 0% of population vaccinated vs 100% vaccinated for entire analysis period |



## 6.2 Factors associated with reduction in standardised GDP, employment rate, and mathematics and reading test scores

The table below shows estimated associations of COVID-19 policy and behavioural responses with state GDP (sector-standardised and defined as the ratio of expected to actual GDP) and employment per capita (sector-standardised and defined as the ratio of expected to actual employment). The GDP and employment models control for education, proportion of the population older than 65 years, proportion of the population younger than 20 years, mean weekly state unemployment benefits, and mean state unemployment benefit duration. The subsequent table shows estimated associations of COVID-19 policy and behavioural responses with changes in fourth-grade mathematics and reading test scores. The values shown in these two tables correspond with Figure 7 in the main text.

### *Factors associated with reduction in standardised GDP and employment rate*

| <b>Dependent Variable</b> | <b>Factor</b>          | <b>Category</b>          | <b>Analysis Period</b>         | <b>Relative Change</b> | <b>Lower UI</b> | <b>Upper UI</b> | <b>Relative change expressed with respect to change of</b>          |
|---------------------------|------------------------|--------------------------|--------------------------------|------------------------|-----------------|-----------------|---------------------------------------------------------------------|
| GDP                       | Mask mandate           | COVID-19 policy response | 01 April, 2020 - 01 June, 2021 | 0.63                   | -2.53           | 3.89            | Mandate never used vs mandate in effect for 100% of analysis period |
| GDP                       | Stay at home order     | COVID-19 policy response | 01 April, 2020 - 01 June, 2021 | 1.03                   | -9.94           | 13.33           | Mandate never used vs mandate in effect for 100% of analysis period |
| GDP                       | Restaurant closure     | COVID-19 policy response | 01 April, 2020 - 01 June, 2021 | -4.29                  | -12.47          | 4.66            | Mandate never used vs mandate in effect for 100% of analysis period |
| GDP                       | Bar closure            | COVID-19 policy response | 01 April, 2020 - 01 June, 2021 | -1.13                  | -4.62           | 2.49            | Mandate never used vs mandate in effect for 100% of analysis period |
| GDP                       | Gathering restriction  | COVID-19 policy response | 01 April, 2020 - 01 June, 2021 | -0.77                  | -3.62           | 2.17            | Mandate never used vs mandate in effect for 100% of analysis period |
| GDP                       | Primary school closure | COVID-19 policy response | 01 April, 2020 - 01 June, 2021 | 2.43                   | -2.02           | 7.10            | Mandate never used vs mandate in effect for 100% of analysis period |

|     |                             |                              |                                |       |        |       |                                                                           |
|-----|-----------------------------|------------------------------|--------------------------------|-------|--------|-------|---------------------------------------------------------------------------|
| GDP | Higher education closure    | COVID-19 policy response     | 01 April, 2020 - 01 June, 2021 | 2.43  | -2.39  | 7.48  | Mandate never used vs mandate in effect for 100% of analysis period       |
| GDP | Gym/pool closure            | COVID-19 policy response     | 01 April, 2020 - 01 June, 2021 | 2.16  | -6.29  | 11.36 | Mandate never used vs mandate in effect for 100% of analysis period       |
| GDP | Vaccine mandates (schools)  | COVID-19 policy response     | 15 March, 2021 - 30 June, 2022 | -2.48 | -5.12  | 0.22  | Reference category: no history of mandate                                 |
| GDP | Vaccine mandates (state)    | COVID-19 policy response     | 01 April, 2020 - 01 June, 2021 | -1.85 | -4.49  | 0.88  | Reference category: no history of mandate                                 |
| GDP | Mandate propensity          | COVID-19 policy response     | 01 April, 2020 - 01 June, 2021 | 0.36  | -1.67  | 2.43  | Mandates never used vs mandate usage similar to that of Washington state  |
| GDP | Federal UI benefit duration | COVID-19 policy response     | 01 April, 2020 - 01 June, 2021 | -3.39 | -10.02 | 3.73  | 1% increase in coverage duration relative to the maximum duration         |
| GDP | Federal UI benefit amount   | COVID-19 policy response     | 01 April, 2020 - 01 June, 2021 | -0.01 | -0.03  | 0.01  | One dollar increase in the mean weekly benefit amount                     |
| GDP | Mask use                    | COVID-19 behavioral response | 01 April, 2020 - 01 June, 2021 | -7.47 | -18.87 | 5.54  | 0% to 100% of the population wears a mask every time they leave the house |
| GDP | Vaccine coverage            | COVID-19 behavioral response | 01 April, 2020 - 01 June, 2021 | 7.65  | -14.96 | 36.27 | 0% of population vaccinated vs 100% vaccinated for entire analysis period |
| GDP | Mobility                    | COVID-19 behavioral response | 01 April, 2020 - 30 June, 2022 | 0.07  | -1.92  | 2.10  | 1 SD increase from the national mean change from pre-pandemic baseline    |

|            |                            |                          |                                |       |        |       |                                                                     |
|------------|----------------------------|--------------------------|--------------------------------|-------|--------|-------|---------------------------------------------------------------------|
| Employment | Mask mandate               | COVID-19 policy response | 01 April, 2020 - 01 June, 2021 | -0.53 | -2.98  | 1.98  | Mandate never used vs mandate in effect for 100% of analysis period |
| Employment | Stay at home order         | COVID-19 policy response | 01 April, 2020 - 01 June, 2021 | -5.67 | -13.63 | 3.03  | Mandate never used vs mandate in effect for 100% of analysis period |
| Employment | Restaurant closure         | COVID-19 policy response | 01 April, 2020 - 01 June, 2021 | -6.74 | -12.83 | -0.23 | Mandate never used vs mandate in effect for 100% of analysis period |
| Employment | Bar closure                | COVID-19 policy response | 01 April, 2020 - 01 June, 2021 | 0.99  | -1.80  | 3.86  | Mandate never used vs mandate in effect for 100% of analysis period |
| Employment | Gathering restriction      | COVID-19 policy response | 01 April, 2020 - 01 June, 2021 | -0.52 | -2.78  | 1.78  | Mandate never used vs mandate in effect for 100% of analysis period |
| Employment | Primary school closure     | COVID-19 policy response | 01 April, 2020 - 01 June, 2021 | 1.20  | -2.27  | 4.80  | Mandate never used vs mandate in effect for 100% of analysis period |
| Employment | Higher education closure   | COVID-19 policy response | 01 April, 2020 - 01 June, 2021 | -0.34 | -4.06  | 3.52  | Mandate never used vs mandate in effect for 100% of analysis period |
| Employment | Gym/pool closure           | COVID-19 policy response | 01 April, 2020 - 01 June, 2021 | -4.09 | -10.26 | 2.50  | Mandate never used vs mandate in effect for 100% of analysis period |
| Employment | Vaccine mandates (schools) | COVID-19 policy response | 15 March, 2021 - 31 July, 2022 | -1.42 | -2.94  | 0.11  | Reference category: no history of mandate                           |
| Employment | Vaccine mandates (state)   | COVID-19 policy response | 15 March, 2021 - 31 July, 2022 | -0.29 | -1.85  | 1.29  | Reference category: no history of mandate                           |

|            |                             |                              |                                    |        |        |       |                                                                           |
|------------|-----------------------------|------------------------------|------------------------------------|--------|--------|-------|---------------------------------------------------------------------------|
| Employment | Mandate propensity          | COVID-19 policy response     | 01 April, 2020 - 01 June, 2021     | -0.59  | -2.16  | 1.01  | Mandates never used vs mandate usage similar to that of Washington state  |
| Employment | Federal UI benefit duration | COVID-19 policy response     | 01 April, 2020 - 31 July, 2022     | -4.13  | -8.39  | 0.32  | 1% increase in coverage duration relative to the maximum duration         |
| Employment | Federal UI benefit amount   | COVID-19 policy response     | 01 April, 2020 - 31 July, 2022     | -0.01  | -0.02  | 0.00  | One dollar increase in the mean weekly benefit amount                     |
| Employment | Mask use                    | COVID-19 behavioral response | 01 April, 2020 - 31 July, 2022     | -11.04 | -18.07 | -3.40 | 0% to 100% of the population wears a mask every time they leave the house |
| Employment | Vaccine coverage            | COVID-19 behavioral response | 15 March, 2021 - 15 December, 2021 | -2.08  | -14.65 | 12.33 | 0% of population vaccinated vs 100% vaccinated for entire analysis period |
| Employment | Mobility                    | COVID-19 behavioral response | 01 April, 2020 - 31 July, 2022     | 0.69   | -0.58  | 1.99  | 1 SD increase from the national mean change from pre-pandemic baseline    |

*Factors associated with reduction in standardized test scores for 4th grade mathematics and reading*

| <b>Dependent Variable</b> | <b>Factor</b>         | <b>Category</b>          | <b>Analysis Period</b>             | <b>Absolute Change</b> | <b>Lower UI</b> | <b>Upper UI</b> | <b>Marginal change expressed with respect to</b>                    |
|---------------------------|-----------------------|--------------------------|------------------------------------|------------------------|-----------------|-----------------|---------------------------------------------------------------------|
| Math score                | Mask mandate          | COVID-19 policy response | 01 April, 2020 - 15 February, 2022 | -3.85                  | -6.92           | -0.78           | Mandate never used vs mandate in effect for 100% of analysis period |
| Math score                | Stay at home order    | COVID-19 policy response | 01 April, 2020 - 15 February, 2022 | -6.93                  | -23.62          | 9.77            | Mandate never used vs mandate in effect for 100% of analysis period |
| Math score                | Gathering restriction | COVID-19 policy response | 01 April, 2020 - 15 February, 2022 | -2.80                  | -6.40           | 0.80            | Mandate never used vs mandate in effect for 100% of analysis period |

|               |                            |                              |                                      |        |        |        |                                                                           |
|---------------|----------------------------|------------------------------|--------------------------------------|--------|--------|--------|---------------------------------------------------------------------------|
| Math score    | Primary school closure     | COVID-19 policy response     | 01 April, 2020 - 15 February, 2022   | -5.36  | -10.98 | 0.25   | Mandate never used vs mandate in effect for 100% of analysis period       |
| Math score    | Higher education closure   | COVID-19 policy response     | 01 April, 2020 - 15 February, 2022   | -4.09  | -11.72 | 3.53   | Mandate never used vs mandate in effect for 100% of analysis period       |
| Math score    | Vaccine mandates (schools) | COVID-19 policy response     | 01 January, 2020 - 15 February, 2022 | -2.26  | -4.13  | -0.39  | Reference category: no history of mandate                                 |
| Math score    | Vaccine mandates (state)   | COVID-19 policy response     | 01 January, 2020 - 15 February, 2022 | -3.04  | -4.48  | -1.60  | Reference category: no history of mandate                                 |
| Math score    | Mandate propensity         | COVID-19 policy response     | 01 January, 2020 - 15 February, 2022 | -3.68  | -6.56  | -0.79  | Mandates never used vs mandate usage similar to that of Washington state  |
| Math score    | Mask use                   | COVID-19 behavioral response | 01 April, 2020 - 15 February, 2022   | -12.97 | -20.98 | -4.96  | 0% to 100% of the population wears a mask every time they leave the house |
| Math score    | Vaccine coverage           | COVID-19 behavioral response | 01 April, 2020 - 15 February, 2022   | -31.29 | -51.82 | -10.77 | 0% of population vaccinated vs 100% vaccinated for entire analysis period |
| Math score    | Mobility                   | COVID-19 behavioral response | 01 April, 2020 - 15 February, 2022   | 2.18   | 0.94   | 3.43   | 1 SD increase from the national mean change from pre-pandemic baseline    |
| Reading score | Mask mandate               | COVID-19 policy response     | 01 April, 2020 - 15 February, 2022   | -1.56  | -4.69  | 1.57   | Mandate never used vs mandate in effect for 100% of analysis period       |
| Reading score | Stay at home order         | COVID-19 policy response     | 01 April, 2020 - 15 February, 2022   | 0.25   | -16.08 | 16.59  | Mandate never used vs mandate in effect for 100% of analysis period       |
| Reading score | Gathering restriction      | COVID-19 policy response     | 01 April, 2020 - 15 February, 2022   | -1.55  | -5.11  | 2.00   | Mandate never used vs mandate in effect for 100% of analysis period       |
| Reading score | Primary school closure     | COVID-19 policy response     | 01 April, 2020 - 15 February, 2022   | -1.66  | -7.29  | 3.97   | Mandate never used vs mandate in effect for 100% of analysis period       |

|               |                            |                              |                                      |        |        |       |                                                                           |
|---------------|----------------------------|------------------------------|--------------------------------------|--------|--------|-------|---------------------------------------------------------------------------|
| Reading score | Higher education closure   | COVID-19 policy response     | 01 April, 2020 - 15 February, 2022   | -2.07  | -9.54  | 5.40  | Mandate never used vs mandate in effect for 100% of analysis period       |
| Reading score | Vaccine mandates (schools) | COVID-19 policy response     | 01 January, 2020 - 15 February, 2022 | -0.75  | -2.65  | 1.16  | Reference category: no history of mandate                                 |
| Reading score | Vaccine mandates (state)   | COVID-19 policy response     | 01 January, 2020 - 15 February, 2022 | -1.79  | -3.34  | -0.24 | Reference category: no history of mandate                                 |
| Reading score | Mandate propensity         | COVID-19 policy response     | 01 January, 2020 - 15 February, 2022 | -1.60  | -4.54  | 1.35  | Mandates never used vs mandate usage similar to that of Washington state  |
| Reading score | Mask use                   | COVID-19 behavioral response | 01 April, 2020 - 15 February, 2022   | -2.79  | -11.30 | 5.72  | 0% to 100% of the population wears a mask every time they leave the house |
| Reading score | Vaccine coverage           | COVID-19 behavioral response | 01 April, 2020 - 15 February, 2022   | -22.20 | -42.98 | -1.41 | 0% of population vaccinated vs 100% vaccinated for entire analysis period |
| Reading score | Mobility                   | COVID-19 behavioral response | 01 April, 2020 - 15 February, 2022   | 0.72   | -0.61  | 2.05  | 1 SD increase from the national mean change from pre-pandemic baseline    |
